# Supplementary material for: Non-erythropoiesis-stimulating agent, non-iron therapies for the management of anaemia: protocol for a scoping review
Source: PubMed Central journal article supplement — BMJ Open. 2022 Apr 10;12(4):e059059. doi: 10.1136/bmjopen-2021-059059 (PMC9003621; doi:10.1136/bmjopen-2021-059059), 2022-04-10
Supplement: bmjopen-2021-059059.draft_revisions.pdf [file bmjopen-2021-059059.draft_revisions.pdf]

# BMJ Open

BMJ Open is committed to open peer review. As part of this commitment we make the peer review history of every article we publish publicly available.

When an article is published we post the peer reviewers' comments and the authors' responses online. We also post the versions of the paper that were used during peer review. These are the versions that the peer review comments apply to.

The versions of the paper that follow are the versions that were submitted during the peer review process. They are not the versions of record or the final published versions. They should not be cited or distributed as the published version of this manuscript.

BMJ Open is an open access journal and the full, final, typeset and author-corrected version of record of the manuscript is available on our site with no access controls, subscription charges or pay-per-view fees (<http://bmjopen.bmj.com>).

If you have any questions on BMJ Open's open peer review process please email [info.bmjopen@bmj.com](mailto:info.bmjopen@bmj.com)

# BMJ Open

## Non-erythropoiesis stimulating agent, non-iron therapies for the management of anaemia: a protocol for a systematic scoping review

|                               |                                                                                                                                                                                                                                                                                                                                                                                            |
|-------------------------------|--------------------------------------------------------------------------------------------------------------------------------------------------------------------------------------------------------------------------------------------------------------------------------------------------------------------------------------------------------------------------------------------|
| Journal:                      | <i>BMJ Open</i>                                                                                                                                                                                                                                                                                                                                                                            |
| Manuscript ID                 | bmjopen-2021-059059                                                                                                                                                                                                                                                                                                                                                                        |
| Article Type:                 | Protocol                                                                                                                                                                                                                                                                                                                                                                                   |
| Date Submitted by the Author: | 07-Nov-2021                                                                                                                                                                                                                                                                                                                                                                                |
| Complete List of Authors:     | Devlin, Paula; The University of Melbourne, Department of Critical Care<br>Davies, Amelia; The University of Western Australia, Department of Surgery<br>Dugan, Cory; The University of Western Australia, Department of Surgery<br>Richards, Toby; The University of Western Australia, Department of Surgery<br>Miles, Lachlan; The University of Melbourne, Department of Critical Care |
| Keywords:                     | Anaemia < HAEMATOLOGY, Adult anaesthesia < ANAESTHETICS, Blood bank & transfusion medicine < HAEMATOLOGY, SURGERY                                                                                                                                                                                                                                                                          |
|                               |                                                                                                                                                                                                                                                                                                                                                                                            |

SCHOLARONE™  
Manuscripts

1  
2  
3 **Non-erythropoiesis stimulating agent, non-iron therapies for the management of**  
4  
5 **anaemia: a protocol for a systematic scoping review**  
6  
7  
8  
9

10 *Paula Devlin, Amelia Davies, Cory Dugan, Toby Richards and Lachlan F. Miles*  
11  
12  
13

14 **AUTHORS**  
15

16 **Paula Devlin**  
17

18  
19 Department of Critical Care, Faculty of Medicine, Dentistry and Health Sciences, The  
20  
21 University of Melbourne, Melbourne, Australia  
22  
23  
24  
25

26 **Amelia Davies**  
27

28 Division of Surgery, Medical School, University of Western Australia, Perth, Australia  
29  
30  
31  
32

33 **Cory Dugan**  
34

35 Division of Surgery, Medical School, University of Western Australia, Perth, Australia  
36  
37  
38  
39

40 **Toby Richards**  
41

42 Division of Surgery, Medical School, University of Western Australia, Perth, Australia  
43  
44  
45  
46

47 **Lachlan F. Miles**  
48

49 Department of Critical Care, Faculty of Medicine, Dentistry and Health Sciences, The  
50  
51 University of Melbourne, Melbourne, Australia  
52  
53  
54  
55  
56  
57  
58  
59  
60

1  
2  
3 Corresponding author: Paula Devlin  
4  
5 Department of Critical Care  
6  
7 Faculty of Medicine, Dentistry and Health Sciences  
8  
9 The University of Melbourne  
10  
11 Grattan Street, Parkville,  
12  
13 Victoria, 3010, Australia  
14  
15  
16  
17  
18

19 Email: [paulamargare@student.unimelb.edu.au](mailto:paulamargare@student.unimelb.edu.au)  
20  
21 [22465712@student.uwa.edu.au](mailto:22465712@student.uwa.edu.au)  
22  
23 [cory.dugan@researchg.uwa.edu.au](mailto:cory.dugan@researchg.uwa.edu.au)  
24  
25 [lachlan.miles@unimelb.edu.au](mailto:lachlan.miles@unimelb.edu.au)  
26  
27 [toby.richards@uwa.edu.au](mailto:toby.richards@uwa.edu.au)  
28  
29  
30  
31

32  
33 Keywords: Anaemia; Inflammation; Hypoxia Inducing Factors; Hepcidin  
34  
35  
36

37 This protocol has been registered prospectively on the Open Science Framework Registry  
38  
39 ([https://osf.io/registries?view\\_only=](https://osf.io/registries?view_only=)).  
40  
41  
42  
43  
44  
45  
46  
47  
48  
49  
50  
51  
52  
53  
54  
55  
56  
57  
58  
59  
60

## ABSTRACT

### Introduction

Pre-operative anaemia is associated with poor postoperative outcomes and is the strongest predictor of allogenic blood transfusion, which contribute further to patient morbidity. As such, emphasis has been placed on correcting anaemia prior to surgery to mitigate these outcomes. Conflicting evidence exists regarding the benefit of currently recommended interventions. With greater understanding of the mechanisms behind iron haemostasis and erythropoiesis, new targeted therapies have been identified. These novel agents are at varying stages of development with some demonstrating promising results in patients with chronic kidney disease. However, it is not known how these agents have been studied outside this population, particularly in the peri-operative context. To address this knowledge gap, we will conduct a scoping review of the published literature to systematically chart the evidence.

### Methods and Analysis

The scoping review will be conducted according to the Preferred Reporting Items for Systematic Reviews and Meta-Analyses Extension for Scoping Reviews framework. We will refine our search strategy with the expertise and guidance of research librarians. The electronic database search will span several databases. This review will have three objectives; (1) describe the mechanisms of action for novel agents; (2) describe the level of evidence and stage of development of novel agents in a perioperative setting; and (3) determine the potential agents suitable for prospective controlled trials in a pre- or postoperative patient cohort and aiming to improve patient centred outcomes. The review process will involve two reviewers screening abstracts and reading full text articles with a third reviewer resolving disagreements. Data will be extracted and organised with subsequent analysis in an iterative process.

### **Ethics and Dissemination**

This scoping review does not require research ethics approval. The results will be published in a peer-reviewed journal and inform the development of future prospective trials based on established evidence from potential therapeutic agents.

For peer review only

## ARTICLE SUMMARY

### Strengths and limitations of this study

- The results of this scoping review will directly inform the design of prospective trials focused on improving patient-centred outcome measures.
- The exclusion of papers published prior to 2010 will focus the study on contemporary evidence specific to our research aims; namely, the stage of development of novel drugs.
- This scoping review will identify the evidence pertaining to a broad range of outcome measures relevant to the peri-operative patient, allowing further characterisation of evidence gaps and direction of future studies.
- Exclusion of studies related to patients with chronic kidney disease will limit indirectness in assessing the evidence outside this population.
- The exclusion of the chronic kidney disease population from our search may in turn limit the results yielded and thus the applicability of our results. However, were this to occur it would not reflect failure, and instead reflect the extent of such gaps in the literature.

## INTRODUCTION

### Rationale

While the global prevalence of anaemia is decreasing, the global burden of disease remains high. Approximately 25% of the general population have anaemia (1), which has been associated with worse outcomes and greater health care costs across a range of specific patient populations.(1-7) There is an independent association between pre-operative anaemia and worse postoperative outcomes.(5, 8-10) Pre-operative anaemia is also the strongest predictor of allogeneic red cell transfusion, which is also associated with worse postoperative outcomes, including risk of delirium, wound complications, sepsis, acute kidney injury and increased length of hospital stay.(11, 12) Absolute or functional iron deficiency (and by extension the ‘anaemia of inflammation’ [AOI]) is the underlying cause of anaemia in most hospitalised patients.(13) AOI occurs due to disruption of the hepcidin-ferroportin axis resulting in iron restricted erythropoiesis, functional iron deficiency and anaemia despite ‘sufficient’ iron stores .(11, 14) AOI confers a poorer prognosis and worsens quality of life.(14, 15)

Renal medicine has treated anaemia previously as a modifiable risk factor that can be targeted to improve patient outcomes. Indeed, intravenous iron and erythropoietin stimulating agents (ESAs) are now standard of care when haemoglobin concentration falls below 100 g/L in this cohort.(9, 16) Intravenous iron has since been shown to improve biochemical and patient centred outcome measures in patients with anaemia without renal disease; however, these results are yet to be translated consistently to the surgical setting.(17-24) As an example, a 2019 Cochrane review and meta-analysis by Ng *et al.* concluded there was no difference in transfusion rates between those who did and those who did not receive iron prior to surgery .(25) These results differ to previous studies in specific surgical populations investigating the same intervention.(26-28) Furthermore, this conclusion contradicts a meta-analysis performed



1  
2  
3 in 2013 which – while having a higher sample size – was not restricted to the peri-operative  
4 setting.(29) More recently, the PREVENTT trial reported similar results in a larger sample.(30)  
5  
6 Like Ng *et al.*, the PREVENTT investigators concluded that pre-operative intravenous iron  
7  
8 was not superior to placebo in reducing the need for blood transfusion or death in patients with  
9  
10 anaemia prior to open, major, elective abdominal surgery. This evidence suggests that  
11  
12 intravenous iron in isolation is an inadequate management option for the anaemia of  
13  
14 inflammation commonly seen in the surgical setting. ESAs similarly improve biochemical  
15  
16 outcomes outside the renal population; however, implementation as part of wider patient blood  
17  
18 management programs has been limited in recent years due to the perceived increased risks of  
19  
20 thrombosis, stroke, and mortality and – particularly in Australia – the lack of a government  
21  
22 pharmaceutical subsidy for this indication.(31) Kei *et al.* addressed some of these concerns  
23  
24 with a meta-analysis conducted in 2019 that reviewed the relative efficacy and safety of ESA  
25  
26 and iron (as recommended in guidelines) vs iron alone.(31) While limited by significant  
27  
28 heterogeneity and potential confounding from the inclusion of studies with non-anaemic  
29  
30 patients, their results suggest a reduced risk of allogenic red cell transfusion in the intervention  
31  
32 group. Importantly their analysis noted no difference regarding safety.  
33  
34  
35  
36  
37  
38  
39  
40  
41

42 Given the heterogeneous results of trials examining intravenous iron as an intervention for  
43  
44 anaemia in surgical patients and the lack of uptake of ESAs as part of standard practice,  
45  
46 attention has shifted to novel agents that purport to treat the causes of anaemia (particularly the  
47  
48 anaemia of inflammation) more directly. These agents have varied mechanisms of action that  
49  
50 attempt to balance the multifactorial nature of anaemia in a multimorbid patients.(32-37) Trials  
51  
52 of one such class of agents, the hypoxia inducible factor – prolyl hydroxylase inhibitors (HIF-  
53  
54 PHIs) have suggested that these agents improve haemoglobin concentration reliably in the  
55  
56 chronic kidney disease (CKD) population.(38-41) However, a recent meta-analysis concluded  
57  
58  
59  
60

1  
2  
3 that while HIF-PHIs demonstrate biochemical efficacy and safety, they lack evidence of benefit  
4  
5 for patient-centred outcome measures.(42) Furthermore, it is unclear what studies have been  
6  
7 conducted in a population outside of patients with CKD. As such, a scoping review of the  
8  
9 literature is necessary to chart the available evidence for novel therapeutics (that is, non-ESA,  
10  
11 non-iron therapies) in the management of anaemia in non-CKD patient cohorts.  
12  
13  
14  
15  
16

## 17 **Objectives**

18  
19 The objectives of this scoping review will be to identify, appraise and map the existing evidence  
20  
21 for any available non-ESA, non-iron agents that can be utilised in patients with pre-operative  
22  
23 anaemia to improve outcomes, guide future research and determine the need for a full  
24  
25 systematic review and meta-analysis. The proposed review will therefore answer the following  
26  
27 questions:  
28  
29

- 30  
31 1. What are the described mechanism of action for non-ESA, non-iron therapies to  
32  
33 increase haemoglobin?
- 34  
35 2. What is the level of evidence and stage of development for non-ESA, non-iron novel  
36  
37 anaemia therapies in a peri-operative setting?
- 38  
39 3. Which potential agents are suitable for prospective controlled trials in a pre- or  
40  
41 postoperative patient cohort with aims to improve peri-operative patient centred outcomes  
42  
43 (including patient-centred outcome measures)?  
44  
45  
46  
47  
48  
49  
50  
51  
52  
53  
54  
55  
56  
57  
58  
59  
60

## METHODS

This protocol draws from the Preferred Reporting Items for Systematic Review and Meta-Analysis – Protocols 2015 (PRISMA-P) checklist (43) and is refined in context to the application of the Preferred Reporting Items for Systematic Reviews and Meta-Analyses Extension for Scoping Reviews (PRISMA-ScR).(44) Where aspects of the PRISMA-P checklist are not applicable, a brief discussion and rational for exclusion will be given.

### Eligibility Criteria

We have used a PICO format to develop our eligibility criteria and outline our outcome measures:

#### Population

We will include studies examining adults  $\geq 18$  years of age with anaemia. Given the varied definition of anaemia used in reporting and to ensure we capture all relevant literature we will define anaemia as any haemoglobin concentration  $< 130$  g/L regardless of sex.(45, 46) Studies in which anaemia is caused by primary renal dysfunction, infection (i.e., malaria) or haemolysis will be excluded. Studies will be excluded if the patient population is restricted to a specific haematological disorder such as sickle cell disease; thalassaemia subgroups; sideroblastic anaemia; haematological malignancy and primary disease of the bone marrow such as myelodysplasia. Any study not performed in humans will be excluded.

#### Intervention

All studies in which anaemia is treated using a non-ESA or iron-based therapy will be reviewed. Primarily, novel agents (those that are neither marketed nor utilised for another primary indication) will be sought. Examples of such interventions and their mechanisms of action are shown in Table 1. Publications will be restricted to those published since 2010. Studies that utilise a novel agent in addition to standard or routine care will be included.

## Comparison

Comparisons will be made to iron preparations (oral or intravenous), ESAs, routine care (i.e., no intervention in addition to standard management) or placebo. We will include studies that do not have a defined comparator for appraisal and charting as appropriate in line with the scoping review methodology

## Outcome

We recognise the recent development of standardised outcome measures defined by the COMPAC-StEP group as the current standard for research in peri-operative medicine; however, as the development of these measures is relatively recent, it is unlikely that many studies will have been performed utilising these endpoints.<sup>(47)</sup> As such, biochemical surrogates will be used to determine efficacy, and the potential for further study of identified agents in a peri-operative context. Where available, patient-related outcomes will be included in the evidence mapping. Similarly, where possible, the total duration of follow-up, as well as the various timepoints used for follow-up during the study will be recorded. Outcomes will be collected as reported. Therefore, we will analyse and grade each agent on the following endpoints:

### Primary outcome:

- Change in haemoglobin concentration between start of intervention and end of follow-up (g/L).

### Secondary outcome:

- Biochemical: Change in ferritin and transferrin saturations; change in hepcidin level;
- Patient centred outcomes: health-related quality of life, disability free survival, functional status, days alive and at home, complications, mortality;
- Healthcare resource utilisation: length of stay, health care costs of treatment;
- Safety: post administration complications, major and minor adverse effects.

1  
2  
3  
4  
5  
6  
7  
8  
9  
10  
11  
12  
13  
14  
15  
16  
17  
18  
19  
20  
21  
22  
23  
24  
25  
26  
27  
28  
29  
30  
31  
32  
33  
34  
35  
36  
37  
38  
39  
40  
41  
42  
43  
44  
45  
46

Table 1  
Mechanism of action and physiological target of novel therapeutic agents for treatment of anaemia

| Class agent                                                                                                                          | Mechanism                                                                                                                                                                                                                                                                              | Relevant physiology                                                                                                                                                                                                                                                                                                                                                                                                  |
|--------------------------------------------------------------------------------------------------------------------------------------|----------------------------------------------------------------------------------------------------------------------------------------------------------------------------------------------------------------------------------------------------------------------------------------|----------------------------------------------------------------------------------------------------------------------------------------------------------------------------------------------------------------------------------------------------------------------------------------------------------------------------------------------------------------------------------------------------------------------|
| <b>Agents that directly antagonise the effects of hepcidin</b>                                                                       |                                                                                                                                                                                                                                                                                        |                                                                                                                                                                                                                                                                                                                                                                                                                      |
| <b>Anticalins (hepcidin binding proteins)</b><br><i>PRS-080</i>                                                                      | Pegylated lipocalin like proteins engineered to bind hepcidin thereby preventing adequate binding to ferroportin.                                                                                                                                                                      | Overproduction of hepcidin due to aberrant inflammatory signals leads to increased ferroportin degradation and reduced iron absorption from the diet leading to iron restricted erythropoiesis and anaemia                                                                                                                                                                                                           |
| <b>Antihepcidin antibodies</b><br><i>AB12B9m, LY2787106</i>                                                                          | Humanised monoclonal antibodies that bind hepcidin with high affinity causing degradation                                                                                                                                                                                              |                                                                                                                                                                                                                                                                                                                                                                                                                      |
| <b>Spiegelmers (hepcidin-binding L-RNA Aptamers)</b><br><i>Lexaptepid pegol – NOX-H94</i>                                            | Blocks hepcidin induced ferroportin internalisation<br>L enantiomers of oligonucleotide that interact like antibodies binding human hepcidin and blocking its function                                                                                                                 |                                                                                                                                                                                                                                                                                                                                                                                                                      |
| <b>Short Interfering and Short Hairpin RNA (siRNA and shRNA)</b><br><i>H6, H10, ALN-HPN</i>                                          | RNA based technology leading to hepcidin gene silencing thereby reducing production of hepcidin mRNA                                                                                                                                                                                   |                                                                                                                                                                                                                                                                                                                                                                                                                      |
| <b>Agents that interact with the BMP6-HJV-SMAD signalling cascade</b>                                                                |                                                                                                                                                                                                                                                                                        |                                                                                                                                                                                                                                                                                                                                                                                                                      |
| <b>ALK2/3 (activin-like kinase receptor) inhibitors</b><br><i>OD66, TP-0184, INCB00928, Momelotinib, Indazole, DS79182026 (ALK3)</i> | Inhibition of the ALK2/3 receptors (a form of BMP receptor) prevents coupling with HJV and BMP6 thereby reducing intracellular signalling for hepcidin expression = decreased hepcidin production                                                                                      | Hemojuvelin (HJV) is a bone morphogenetic protein (BMP) co receptor<br><br>High iron stimulates binding of circulating BMP6 to BMP receptor types I and II with co-receptor HJV on the hepatocyte membrane. This stable multiplex causes the activation of SMAD signal cascade<br>Intracellular SMAD1/5/8 proteins complex with SMAD4 that then translocates to the nucleus causing induction of hepcidin expression |
| <b>Inhibitors of BMP type 1 receptor</b><br><i>Dorsomorphin, LDN-193189, LDN-212854</i>                                              | Inhibit BMP-, HJV-, and IL-6-stimulated hepcidin expression in hepatocytes and block iron induced hepcidin mRNA<br>- Dorsomorphin is also a nonselective kinase inhibitor of AMP kinase (off-target effects)<br>- LDN-193189 with increased potency and selectivity for BMP inhibition |                                                                                                                                                                                                                                                                                                                                                                                                                      |
| <b>BMP6 sequestering agents</b><br><i>Anticoagulant and non-anticoagulant hepcidins</i>                                              | Sequester BMP activity, inhibit BMP6-mediated hepcidin transcription and decrease SMAD phosphorylation thereby reducing hepcidin expression                                                                                                                                            |                                                                                                                                                                                                                                                                                                                                                                                                                      |
| <b>Hemojuvelin (BMP co-receptor)</b><br><i>sHJV.Fc, h5F9.23, h5F9-AM, ABT-207</i>                                                    | Antibodies that cause cleavage of hemojuvelin and interferes with BMP binding to the BMPR thereby decreasing hepcidin transcription.                                                                                                                                                   |                                                                                                                                                                                                                                                                                                                                                                                                                      |
| <b>Transferrin receptor (TRF2)</b><br><i>RNAi</i>                                                                                    | Experimental gene silencing technology aimed towards the transferrin receptor                                                                                                                                                                                                          |                                                                                                                                                                                                                                                                                                                                                                                                                      |

| <b>Agents that interact with the IL-6/STAT3 signalling pathway</b>                                                                                                                                                                                                                                                                                                                                                                                                                                                                                                                                                            |                                                                                                                                                                                                                                                                                         |                                                                                                                                                                                                                                                                                                                                                                                                                                                                                                                                                                                                                                                                                                                                                                                                        |
|-------------------------------------------------------------------------------------------------------------------------------------------------------------------------------------------------------------------------------------------------------------------------------------------------------------------------------------------------------------------------------------------------------------------------------------------------------------------------------------------------------------------------------------------------------------------------------------------------------------------------------|-----------------------------------------------------------------------------------------------------------------------------------------------------------------------------------------------------------------------------------------------------------------------------------------|--------------------------------------------------------------------------------------------------------------------------------------------------------------------------------------------------------------------------------------------------------------------------------------------------------------------------------------------------------------------------------------------------------------------------------------------------------------------------------------------------------------------------------------------------------------------------------------------------------------------------------------------------------------------------------------------------------------------------------------------------------------------------------------------------------|
| <b>JAK/STAT3 inhibition</b><br><i>AG490</i><br><i>PpYLKTK</i>                                                                                                                                                                                                                                                                                                                                                                                                                                                                                                                                                                 | AG490 inhibits the phosphorylation of STAT3 by JAK2 thereby no binding of STAT3 responsive element and reduced hepcidin expression<br>PpYLKTK is a peptide agent that disrupts pSTAT3 dimerization required for binding of hepcidin promoting target genes                              | Proinflammatory cytokines released due to a variety of stimulants e.g. malignancy. IL-6 binds IL-6 receptor on hepatocyte activating the JAK1/2 cascade causing phosphorylation of STAT3 transcription factor (STAT3-TF) that then translocates to the nucleus<br>In the nucleus STAT3-TF binds STAT3 responsive element (STAT-RE) on hepcidin promoter region<br>STAT3-RE must be coupled with BMP-RE (which is activated via the BMP/HJV/SMAD pathway) for IL-6 mediated hepcidin expression to occur<br>Once coupled hepcidin translation occurs with hepcidin release and degradation of ferroportin<br>Erythroferron suppresses hepcidin to promote the mobilization of stored iron and the absorption of dietary iron, so that the increased iron demands of developing erythrocytes can be met. |
| <b>AMPK activator</b><br><i>Metformin</i> , DS79182026                                                                                                                                                                                                                                                                                                                                                                                                                                                                                                                                                                        | AMP-activated protein kinase (AMPK) promotes JAK2 degradation reducing STAT3 phosphorylation and hepcidin expression                                                                                                                                                                    |                                                                                                                                                                                                                                                                                                                                                                                                                                                                                                                                                                                                                                                                                                                                                                                                        |
| <b>IL-6 inhibitors</b><br><i>Toclizumab</i> , <i>Siltuximab</i>                                                                                                                                                                                                                                                                                                                                                                                                                                                                                                                                                               | Inhibit the IL-6/STAT3 pathway via antibodies to the IL-6 receptor (tocilizumab) or via antibodies to the IL-6 ligand<br>- Limited by increased infective risks                                                                                                                         |                                                                                                                                                                                                                                                                                                                                                                                                                                                                                                                                                                                                                                                                                                                                                                                                        |
| <b>IL1-β inhibitors</b><br><i>Canakinumab</i>                                                                                                                                                                                                                                                                                                                                                                                                                                                                                                                                                                                 | Monoclonal antibody against IL1-β involved in the inflammatory pathway                                                                                                                                                                                                                  |                                                                                                                                                                                                                                                                                                                                                                                                                                                                                                                                                                                                                                                                                                                                                                                                        |
| <b>Erythroferrone</b>                                                                                                                                                                                                                                                                                                                                                                                                                                                                                                                                                                                                         | Erythroferrone (ERFE) is responsible for early hepcidin suppression during erythropoietic activity stimulated by endogenous or exogenous EPO.                                                                                                                                           |                                                                                                                                                                                                                                                                                                                                                                                                                                                                                                                                                                                                                                                                                                                                                                                                        |
| <b>Agents upregulating erythropoiesis (negative regulator of hepcidin)</b>                                                                                                                                                                                                                                                                                                                                                                                                                                                                                                                                                    |                                                                                                                                                                                                                                                                                         |                                                                                                                                                                                                                                                                                                                                                                                                                                                                                                                                                                                                                                                                                                                                                                                                        |
| <b>HIF-prolyl hydroxylase inhibitors (EGLN inhibitors)</b><br><i>Roxadustat</i> , <i>Vadadustat</i> ,<br><i>Daprodustat</i> , <i>Enarodustat</i> ,<br><i>FG-4692</i> , <i>AKB-6548</i> ,<br><i>GSK1278863</i> , <i>JTZ-951</i> ,<br><i>BAY85-3934</i>                                                                                                                                                                                                                                                                                                                                                                         | Prolyl hydroxylase domain-2 (PDH2) inhibitors stabilize HIF-1 and HIF-2 → stable HIF stimulates endogenous erythropoietin production which suppresses hepcidin leading to greater iron availability for erythropoiesis<br>- Activates HIF in presence of oxygen (normocemic conditions) | Hypoxia stimulates the production of EPO via signalling by hypoxia inducible factor (HIF) which also suppresses hepcidin production. Under normoxic conditions, prolyl hydroxylases constitutively degrade HIF, allowing hepcidin production to occur.                                                                                                                                                                                                                                                                                                                                                                                                                                                                                                                                                 |
| <b>Agents interacting with Ferroportin</b>                                                                                                                                                                                                                                                                                                                                                                                                                                                                                                                                                                                    |                                                                                                                                                                                                                                                                                         |                                                                                                                                                                                                                                                                                                                                                                                                                                                                                                                                                                                                                                                                                                                                                                                                        |
| <b>Ferroportin agonists/stabilisers</b><br><i>LY2928057</i><br><i>Fursultiamine</i>                                                                                                                                                                                                                                                                                                                                                                                                                                                                                                                                           | Humanized antibody to ferroportin that block the hepcidin-ferroportin interaction while maintaining ferroportin function thereby maintain iron influx.<br>- Fursultiamine prevents hepcidin-FPN interactions by competing with hepcidin to bind FPN on the hepcidin binding site        | FPN is a transmembrane protein that is expressed by duodenal enterocytes, splenic macrophages, and hepatocytes<br>↑ hepcidin causes degradation of ferroportin leading to inability to mobilise store iron                                                                                                                                                                                                                                                                                                                                                                                                                                                                                                                                                                                             |
| Note. Mechanism and relevant physiology description are adapted from The Hepcidin-Ferroportin System as a Therapeutic Target in Anemias and Iron Overload Disorders, by Ganz et al <i>Hematology</i> 2011(32), "Hepcidin Therapeutics" by Katsarou et al, <i>Pharmaceuticals</i> 2018(33), pharmacological targeting of the hepcidin/ferroportin axis by Sebastiani et al, <i>Frontiers in pharmacology</i> 2016(36), and "Targeting the hepcidin-ferroportin axis to develop new treatment strategies for anemia of chronic disease and anemia of inflammation" by Sun et al. <i>American Journal of Hematology</i> 2012(37) |                                                                                                                                                                                                                                                                                         |                                                                                                                                                                                                                                                                                                                                                                                                                                                                                                                                                                                                                                                                                                                                                                                                        |

1  
2  
3 Publication type, study design, language, and timeframe  
4  
5

6 We will include prospective and retrospective observational studies and randomised and  
7  
8 pseudo-randomised controlled trials. Controlled trials can be of any design including parallel,  
9  
10 cross over and cluster randomised trials. Open-label clinical trials will be eligible for inclusion.  
11  
12 Preclinical safety and dose finding studies in humans will be included. Commentaries, letters,  
13  
14 and conference abstracts will be included. Case reports, case studies and animal studies will be  
15  
16 excluded. No limitation will be placed on the setting or time frame of follow up or on language  
17  
18 or country of study. We will only include studies published since January 1, 2010.  
19  
20  
21  
22  
23  
24

### 25 **Information sources**

26  
27 The search will be run in Scopus, MEDLINE (Ovid) and Excerpta Medica database (Ovid) to  
28  
29 account for variability in the indexing in each database. We will supplement the electronic  
30  
31 database search by searching for ongoing or recently completed trial protocols in international  
32  
33 trial registries including clinicaltrials.gov, the Australian New Zealand Clinical Trials Registry  
34  
35 (ANZCTR), the European Union Clinical Trial register and the International Clinical Trials  
36  
37 Registry Platform (ICTRP). Each article included in the review will have its reference list  
38  
39 scanned to ensure literature saturation.  
40  
41  
42  
43  
44  
45

### 46 **Search strategy**

47  
48 We conducted an initial abbreviated search to refine and define our search terms and to avoid  
49  
50 duplication of any existing systematic reviews. This was subsequently used to develop a  
51  
52 systematic search strategy using medical subject headings (MeSH) with Boolean operations.  
53  
54  
55  
56

57 The search strategy was developed with the help of the information specialists from the  
58  
59 University of Western Australia, was piloted against a random search of 50 abstracts, and  
60

1  
2  
3 refined subsequently. Search results will be limited to abstracts published after 2010 with no  
4 language or jurisdiction limitations. The international clinical trial registry platform search  
5 portal and clinical trial.gov will be search for ongoing or recently completed trials. PROSPERO  
6 will be reviewed for any ongoing or recent systematic reviews. The search includes general  
7 terms to describe anaemia and potential pathways to management, as well as more specific  
8 terms (i.e., prolyl hydroxylase inhibitors). The full version of the search strategy can be found  
9 in Supplemental File 1.  
10  
11  
12  
13  
14  
15  
16  
17  
18  
19  
20  
21

## 22 **Study records**

### 23 Data management

24  
25 The scoping review will be conducted using the framework as described by Arksey and  
26 O'Malley (48) and reported against the PRISMA-ScR checklist.(44) The literature search  
27 results will be imported into a systematic review management program (Covidence,  
28 Melbourne, Australia) to facilitate the study selection process. Abstracts and citations will be  
29 uploaded and screened against inclusion criteria. A data extraction form was developed and  
30 piloted by the review team based on the study inclusion and exclusion criteria (Supplemental  
31 File 2).  
32  
33  
34  
35  
36  
37  
38  
39  
40  
41  
42  
43  
44  
45  
46  
47  
48  
49  
50  
51  
52  
53  
54  
55  
56  
57  
58  
59  
60



### Selection process

Two independent review authors (AD and PD) will screen all titles and abstracts yielded by the search against the inclusion criteria. For any abstract where consensus is not achieved a third reviewer (CD or LFM) will adjudicate its suitability for inclusion. For any article that meets the inclusion criteria, a full text extraction will be obtained. For any full text articles that do not meet the inclusion criteria the reason for exclusion will be documented.

### Data collection process

Data will be independently extracted by two authors (AD and PD) using a predeveloped and piloted data extraction form (Supplemental File 2). Again, for any extraction where there is no consensus between the two authors, a third author (CD or LFM) will adjudicate. To ensure consistency between reviewers a calibration exercise has been performed prior to commencing the formal data collection process. In keeping with established scoping review methodology ongoing consultation with the senior members of the scoping team (TR and LFM) will occur to guide additional data extraction from the papers as deemed necessary. Where data requires further confirmation, all attempts will be made to seek clarification from the corresponding author of the study and where it is unable to be confirmed will be documented in the results.

### Data items

Data will be sought for the following variables:

1. Participant information including n value, treatment setting and descriptive data of participants (age, gender, diagnostic criteria, treatment history, documented comorbidities);
2. Study methodology including study design, country, setting and design limitations;

- 3 3. Study intervention and comparator including duration of treatment, timepoints for  
4 follow-up, route of intervention (oral or intravenous), frequency of intervention;  
5  
6
- 7 4. Primary and secondary outcomes as defined above.  
8  
9

### 11 **Outcomes and prioritisations**

12 We have chosen to identify and define our outcome measures *a priori*, however, given the  
13 scoping nature of this systematic review, revision of these outcomes and expansion or  
14 refinement as necessary will occur through the full text review and data extraction process.  
15  
16

17 The primary outcome of this review will be to investigate which agents facilitate an increase  
18 in haemoglobin concentration from baseline as defined by the individual study criteria. Change  
19 in haemoglobin concentration is used frequently as an indication of treatment efficacy in  
20 clinical trials that aim to treat anaemia. It is therefore expected to be an endpoint in any study  
21 investigating novel agents for use in anaemia. Change in haemoglobin concentration is not  
22 without limitations, most importantly the potential lack of consistent associations with  
23 meaningful clinical changes such as complication rates, particularly in a peri-operative patient  
24 cohort. Therefore, this measure will be considered in addition to secondary outcomes to  
25 determine the suitability of a potential novel agent for use in a peri-operative patient cohort.  
26 The time taken to demonstrate a change in haemoglobin concentration will be of importance,  
27 given that these patients often require an intervention that offers benefit within a limited time  
28 period prior to surgery.<sup>(49)</sup> Therefore, any timepoint for which haemoglobin concentration is  
29 recorded following a baseline measurement will be reviewed. Similarly the optimal time to  
30 intervene in patients with pre-operative anaemia is not yet known, further highlighting the need  
31 to characterise the timeline of changes in haemoglobin concentration.  
32  
33  
34  
35  
36  
37  
38  
39  
40  
41  
42  
43  
44  
45  
46  
47  
48  
49  
50  
51  
52  
53  
54  
55  
56  
57  
58  
59  
60

1  
2  
3 Where available, data pertaining to iron parameters (ferritin, transferrin saturation, soluble  
4 transferrin receptor) will be recorded and reviewed to further inform the potential patient  
5 cohorts in which the novel agents may be best suited. Patients will be considered as being iron  
6 deficient or having inadequate iron stores if they define a cut off of ferritin < 100 µmol/L or  
7 transferrin saturation < 20%.<sup>(50)</sup> As previously discussed, the cause of anaemia can be  
8 multifactorial and so understanding the interplay of a potential therapeutic agent with the  
9 concomitant cause of anaemia will be important in developing participant selection criteria for  
10 future prospective interventional studies.  
11  
12  
13  
14  
15  
16  
17  
18  
19  
20  
21  
22  
23

24 In peri-operative research there is an imperative to ensure that research include clinically  
25 relevant patient centred outcome measures (47) to ensure that therapies have a significant effect  
26 on the functional and physical capacity of the patient in addition to procedural complications.  
27 Therefore, we will also determine to what extent patient centred outcomes have been  
28 investigated thus far. It is unknown if there will be any data on survival measures or healthcare  
29 resource utilisation. This review will address this by collecting data on patient mortality,  
30 morbidity, length of hospital and/or ICU stay and health care costs of treatment.  
31  
32  
33  
34  
35  
36  
37  
38  
39  
40  
41

42 Safety of tested interventions will be assessed through documented major and minor adverse  
43 effects. Any immediate post-administration complications or side-effects will be reviewed.  
44 Charting of this data (particularly those data describing different interventions or combinations  
45 of interventions) will inform future clinical trial design.  
46  
47  
48  
49  
50  
51  
52  
53

#### 54 **Risk of bias**

55  
56 Given the scoping nature of this review a formal bias assessment will not be performed.  
57  
58  
59  
60

### **Data synthesis**

The review will be reported in accordance with the PRISMA-ScR guidelines.(44)

Demographic and methodological data will be charted in a tabulated form. Study interventions and outcome data will be charted as a combination of narrative discussion and an alluvial diagram. An alluvial diagram is a type of flow diagram designed to represent dynamic relationships in a system. We intend to use this to cluster the different variables from our data set to show the relationship and volume of evidence in a particular area; Simple frequency analysis will inform the size of the components between each stream. A stream will be a novel drug or drugs with similar mechanism. Streams will then be 'blocked' according to the following: agent; patient population; study type; comparator; added treatment; outcomes. In keeping with scoping review methodology, a meta-analysis will not be performed.

### **Meta-bias**

This scoping review has been undertaken to inform if there is a need for a more formal systematic review; accordingly, a meta-bias analysis is beyond the scope of this review.

### **Confidence in cumulative evidence**

A through assessment of the risk of bias and other factors that can be used to describe the quality of evidence falls beyond the capacity of this review and lies outside the proposed scoping methodology. Such an assessment will not be included.

### **Patient and public involvement**

No patient involved

### **ETHICS AND DISSEMINATION**

This scoping review will be conducted and reported following the PRISMA-ScR criteria.

Ethics approval is not required as the study will only review previously published literature.

The findings of this scoping review will be published in a peer-reviewed scientific journal.

As indicated throughout this manuscript the results of this study will inform the methodology of future prospective studies utilising novel agents for the management of anaemia in the perioperative setting.

For peer review only

### Authors statement

LFM is the guarantor. AD, PD and LFM drafted the manuscript. TR was involved with critical revision of the abstract for important intellectual content. All authors contributed to the development of the selection criteria, the data extraction criteria, and the charting methodology. AD and CD developed the search strategy. All authors read, provided feedback, and approved the final manuscript. The authors acknowledge the assistance of the information specialists of the University of Western Australia University Library in devising the search strategy.

### Amendments

In the event of protocol amendments, the date of the amendment will be accompanied by a description of the change and the rationale in the listing on the Open Science Framework Registry.

### Funding

This research received no specific grant from any funding agency in the public, commercial or not-for-profit sectors.

### Competing interests

All authors have completed the ICMJE uniform disclosure form at <http://www.icmje.org/disclosure-of-interest/> and declare: the Division of Surgery of the University of Western Australia is the Sponsor, with overall control of the data. TR reports grants from the National Institute for Health Research (UK), National Health and Medical Research Council (Australia), grants, personal fees and non-financial support from Pharmocosmos Therapeutics Inc., grants, personal fees and non-financial support from Vifor Pharma Pty Ltd, grants from the Medical Research Future Fund (Australia), grants from the

1  
2  
3 Future Health Research and Innovation Fund (Western Australia), grants and personal fees  
4 from Pfizer Pty Ltd (Australia), and personal fees from BioAge Labs Inc., outside the submitted  
5 work; TR is a regular speaker at national and international conferences on anaemia, blood  
6 transfusion, wound healing and vascular disease for which he has received expenses for travel,  
7 accommodation and sundries, TR has worked with several agencies promoting meetings or  
8 healthcare, TR is a director of The Iron Clinic Ltd, director of Veincare London Ltd and Vein  
9 Care WA. TR is the Vascular lead for 18-week wait Ltd. LM reports grants from Vifor Pharma  
10 Pty Ltd, the Australian and New Zealand College of Anaesthetists, the Victorian Department  
11 of Health, the Epworth Medical foundation and the Austin Medical Research foundation,  
12 outside the submitted work. LM has a leadership or fiduciary role with the National Medical  
13 Advisory Committee, Red Cross Lifeblood, Australia and Blood Matters Advisory Committee,  
14 Department of Health, Victorian State Government. PD, AD and CD declare no financial  
15 relationships with any organisations that might have an interest in the submitted work in the  
16 previous three years and no other relationships or activities that could appear to have influenced  
17 the submitted work.  
18  
19  
20  
21  
22  
23  
24  
25  
26  
27  
28  
29  
30  
31  
32  
33  
34  
35  
36  
37  
38  
39  
40  
41  
42  
43  
44  
45  
46  
47  
48  
49  
50  
51  
52  
53  
54  
55  
56  
57  
58  
59  
60

**REFERENCES**

1. Kassebaum NJ, Collaborators GBDA. The Global Burden of Anemia. *Hematol Oncol Clin North Am.* 2016;30(2):247-308.
2. Caro JJ, Salas M, Ward A, et al. Anemia as an independent prognostic factor for survival in patients with cancer: a systemic, quantitative review. *Cancer.* 2001;91(12):2214-21.
3. Cella D. Quality of life and clinical decisions in chemotherapy-induced anemia. *Oncology (Williston Park).* 2006;20(8 Suppl 6):25-8.
4. Koutroubakis IE, Ramos-Rivers C, Regueiro M, et al. Five-Year Period Prevalence and Characteristics of Anemia in a Large US Inflammatory Bowel Disease Cohort. *J Clin Gastroenterol.* 2016;50(8):638-43.
5. Musallam KM, Tamim HM, Richards T, et al. Preoperative anaemia and postoperative outcomes in non-cardiac surgery: a retrospective cohort study. *Lancet.* 2011;378(9800):1396-407.
6. Shander A, Javidroozi M, Lobel G. Patient blood management in the intensive care unit. *Transfusion medicine reviews.* 2017;31(4):264-71.
7. Shorr AF, Doyle J, Stern L, et al. Anemia in chronic obstructive pulmonary disease: epidemiology and economic implications. *Current Medical Research and Opinion.* 2008;24(4):1123-30.
8. Baron DM, Hochrieser H, Posch M, et al. Preoperative anaemia is associated with poor clinical outcome in non-cardiac surgery patients. *Br J Anaesth.* 2014;113(3):416-23.
9. Spinowitz B, Pecoits-Filho R, Winkelmayr WC, et al. Economic and quality of life burden of anemia on patients with CKD on dialysis: a systematic review. *Journal of Medical Economics.* 2019;22(6):593-604.



10. Partridge J, Harari D, Gossage J, et al. Anaemia in the older surgical patient: a review of prevalence, causes, implications and management. *J R Soc Med*. 2013;106(7):269-77.
11. Muñoz M, Gómez-Ramírez S, Campos A, et al. Pre-operative anaemia: prevalence, consequences and approaches to management. *Blood Transfus*. 2015;13(3):370-9.
12. Glance LG, Dick AW, Mukamel DB, et al. Association between Intraoperative Blood Transfusion and Mortality and Morbidity in Patients Undergoing Noncardiac Surgery. *Anesthesiology*. 2011;114(2):283-92.
13. Warner MA, Shore-Lesserson L, Shander A, et al. Perioperative anemia: prevention, diagnosis, and management throughout the spectrum of perioperative care. *Anesthesia & Analgesia*. 2020;130(5):1364-80.
14. Nemeth E, Ganz T. Anemia of inflammation. *Hematol Oncol Clin North Am*. 2014;28(4):671-81, vi.
15. LT WGG. Anemia of Chronic Disease. *N Engl J Med*. 2005;352(10):1011-23.
16. Hanna RM, Streja E, Kalantar-Zadeh K. Burden of Anemia in Chronic Kidney Disease: Beyond Erythropoietin. *Adv Ther*. 2021;38(1):52-75.
17. McSorley ST, Anderson JH, Whittle T, et al. The impact of preoperative systemic inflammation on the efficacy of intravenous iron infusion to correct anaemia prior to surgery for colorectal cancer. *Perioper Med (Lond)*. 2020;9:17-.
18. Adamson JW. The Anemia of Inflammation/Malignancy: Mechanisms and Management. *Hematology*. 2008;2008(1):159-65.
19. Borstlap WAA, Stellingwerf ME, Moolla Z, et al. Iron therapy for the treatment of preoperative anaemia in patients with colorectal carcinoma: a systematic review. *Colorectal Disease*. 2015;17(12):1044-54.

- 1  
2  
3 20. Evans CR, Jones R, Phillips G, et al. Observational study of pre-operative intravenous  
4 iron given to anaemic patients before elective cardiac surgery. *Anaesthesia*. 2021;76(5):639-  
5  
6 46.  
7  
8
- 9  
10 21. Moon T, Smith A, Pak T, et al. Preoperative Anemia Treatment with Intravenous Iron  
11  
12  
13  
14  
15  
16  
17  
18  
19  
20  
21  
22  
23  
24  
25  
26  
27  
28  
29  
30  
31  
32  
33  
34  
35  
36  
37  
38  
39  
40  
41  
42  
43  
44  
45  
46  
47  
48  
49  
50  
51  
52  
53  
54  
55  
56  
57  
58  
59  
60  
21. Moon T, Smith A, Pak T, et al. Preoperative Anemia Treatment with Intravenous Iron  
Therapy in Patients Undergoing Abdominal Surgery: A Systematic Review. *Adv Ther*.  
2021;38(3):1447-69.
22. Quarterman C, Shaw M, Hughes S, et al. Anaemia in cardiac surgery – a retrospective  
review of a centre's experience with a pre-operative intravenous iron clinic. *Anaesthesia*.  
2021;76(5):629-38.
23. Shah A, Palmer AJR, Fisher SA, et al. What is the effect of perioperative intravenous  
iron therapy in patients undergoing non-elective surgery? A systematic review with meta-  
analysis and trial sequential analysis. *Perioper Med (Lond)*. 2018;7:30-.
24. So-Osman C, Nelissen RG, Koopman-van Gemert AW, et al. Patient blood  
management in elective total hip- and knee-replacement surgery (Part 1): a randomized  
controlled trial on erythropoietin and blood salvage as transfusion alternatives using a  
restrictive transfusion policy in erythropoietin-eligible patients. *Anesthesiology*.  
2014;120(4):839-51.
25. Ng O, Keeler BD, Mishra A, et al. Iron therapy for preoperative anaemia. *Cochrane  
Database of Systematic Reviews*. 2019(12).
26. Okuyama M, Ikeda K, Shibata T, et al. Preoperative Iron Supplementation and  
Intraoperative Transfusion During Colorectal Cancer Surgery. *Surgery Today*. 2005;35(1):36-  
40.
27. Cuenca J, García-Erce JA, Martínez AA, et al. Role of parenteral iron in the  
management of anaemia in the elderly patient undergoing displaced subcapital hip fracture  
repair: preliminary data. *Archives of Orthopaedic and Trauma Surgery*. 2005;125(5):342-7.

- 1  
2  
3 28. Muñoz M, Gómez-Ramírez S, Cuenca J, et al. Very-short-term perioperative  
4 intravenous iron administration and postoperative outcome in major orthopedic surgery: a  
5 pooled analysis of observational data from 2547 patients. *Transfusion*. 2014;54(2):289-99.  
6  
7  
8  
9  
10 29. Litton E, Xiao J, Ho KM. Safety and efficacy of intravenous iron therapy in reducing  
11 requirement for allogeneic blood transfusion: systematic review and meta-analysis of  
12 randomised clinical trials. *BMJ : British Medical Journal*. 2013;347:f4822.  
13  
14  
15  
16  
17 30. Richards T, Baikady RR, Clevenger B, et al. Preoperative intravenous iron to treat  
18 anaemia before major abdominal surgery (PREVENTT): a randomised, double-blind,  
19 controlled trial. *The Lancet*. 2020;396(10259):1353-61.  
20  
21  
22  
23  
24 31. Kei T, Mistry N, Curley G, et al. Efficacy and safety of erythropoietin and iron therapy  
25 to reduce red blood cell transfusion in surgical patients: a systematic review and meta-analysis.  
26  
27  
28  
29  
30  
31  
32  
33  
34  
35  
36  
37  
38  
39  
40  
41  
42  
43  
44  
45  
46  
47  
48  
49  
50  
51  
52  
53  
54  
55  
56  
57  
58  
59  
60
32. Ganz T, Nemeth E. The Hepcidin-Ferroportin System as a Therapeutic Target in  
Anemias and Iron Overload Disorders. *Hematology*. 2011;2011(1):538-42.
33. Katsarou A, Pantopoulos K. Hepcidin Therapeutics. *Pharmaceuticals*. 2018;11(4):127.
34. Langer AL, Ginzburg YZ. Role of hepcidin-ferroportin axis in the pathophysiology,  
diagnosis, and treatment of anemia of chronic inflammation. *Hemodialysis International*.  
2017;21:S37-S46.
35. Sagar P, Angmo S, Sandhir R, et al. Effect of hepcidin antagonists on anemia during  
inflammatory disorders. *Pharmacology & Therapeutics*. 2021;226:107877.
36. Sebastiani G, Wilkinson N, Pantopoulos K. Pharmacological targeting of the  
hepcidin/ferroportin axis. *Frontiers in pharmacology*. 2016;7:160.
37. Sun CC, Vaja V, Babitt JL, et al. Targeting the hepcidin-ferroportin axis to develop  
new treatment strategies for anemia of chronic disease and anemia of inflammation. *Am J  
Hematol*. 2012;87(4):392-400.

- 1  
2  
3 38. Wen T, Zhang X, Wang Z, et al. Hypoxia-Inducible Factor Prolyl Hydroxylase  
4 Inhibitors in Patients with Renal Anemia: A Meta-Analysis of Randomized Trials. *Nephron*.  
5  
6 2020;144(11):572-82.  
7  
8  
9  
10 39. Zhang S, Guo J, Xie S, et al. Efficacy and safety of hypoxia-inducible factor prolyl  
11 hydroxylase inhibitor (HIF-PHI) on anemia in non-dialysis-dependent chronic kidney disease  
12 (NDD-CKD): a systematic review and meta-analysis. *International Urology and Nephrology*.  
13  
14 2021;53(6):1139-47.  
15  
16  
17  
18 40. Jia L, Dong X, Yang J, et al. Effectiveness of hypoxia-inducible factor prolyl  
19 hydroxylase inhibitor roxadustat on renal anemia in non-dialysis-dependent chronic kidney  
20 disease: a systematic review and meta-analysis. *Ann Transl Med*. 2019;7(23):720-  
21  
22  
23  
24 41. Wang B, Yin Q, Han Y-C, et al. Effect of hypoxia-inducible factor-prolyl hydroxylase  
25 inhibitors on anemia in patients with CKD: a meta-analysis of randomized controlled trials  
26 including 2804 patients. *Renal Failure*. 2020;42(1):912-25.  
27  
28  
29  
30 42. Chen H, Cheng Q, Wang J, et al. Long-term efficacy and safety of hypoxia-inducible  
31 factor prolyl hydroxylase inhibitors in anaemia of chronic kidney disease: A meta-analysis  
32 including 13,146 patients. *Journal of Clinical Pharmacy and Therapeutics*. 2021;46(4):999-  
33  
34  
35  
36  
37  
38  
39  
40  
41  
42 43. Moher D, Shamseer L, Clarke M, et al. Preferred reporting items for systematic review  
43 and meta-analysis protocols (PRISMA-P) 2015 statement. *Systematic reviews*. 2015;4(1):1-9.  
44  
45  
46  
47 44. Tricco AC, Lillie E, Zarin W, et al. PRISMA extension for scoping reviews (PRISMA-  
48 ScR): checklist and explanation. *Annals of internal medicine*. 2018;169(7):467-73.  
49  
50  
51 45. Butcher A, Richards T, Stanworth SJ, et al. Diagnostic criteria for pre-operative  
52 anaemia—time to end sex discrimination. *Anaesthesia*. 2017;72(7):811-4.  
53  
54  
55  
56  
57  
58  
59  
60

- 1  
2  
3 46. Miles LF, Larsen T, Bailey MJ, et al. Borderline anaemia and postoperative outcome  
4 in women undergoing major abdominal surgery: a retrospective cohort study. *Anaesthesia*.  
5  
6 2020;75(2):210-7.  
7  
8  
9  
10 47. Myles PS, Grocott MPW, Boney O, et al. Standardizing end points in perioperative  
11 trials: towards a core and extended outcome set. *BJA: British Journal of Anaesthesia*.  
12  
13 2016;116(5):586-9.  
14  
15  
16  
17 48. Arksey H, O'Malley L. Scoping studies: towards a methodological framework.  
18 *International journal of social research methodology*. 2005;8(1):19-32.  
19  
20  
21 49. Whittaker TM, Abdelrazek ME, Fitzpatrick AJ, et al. Delay to elective colorectal cancer  
22 surgery and implications for survival: a systematic review and meta-analysis. *Colorectal*  
23 *Disease*. 2021.  
24  
25  
26  
27  
28 50. Muñoz M, Acheson AG, Bisbe E, et al. An international consensus statement on the  
29 management of postoperative anaemia after major surgical procedures. *Anaesthesia*.  
30  
31 2018;73(11):1418-31.  
32  
33  
34  
35  
36  
37  
38  
39  
40  
41  
42  
43  
44  
45  
46  
47  
48  
49  
50  
51  
52  
53  
54  
55  
56  
57  
58  
59  
60

**Medline:**

- 1 iron defic\*.ti.
- 2 an\*emia not (leuk\*emia or h\*emolytic or sickle or malaria or myelodysplas\* or sideroblast\* or thalassemia\*).ti.
- 3 h\*emoglobin.tw.
- 4 treatment\* or therap\* or drug\* or pharm\*.tw.
- 5 1 or 2
- 6 5 and 3 and 4
- 7 STAT3 inhibi\* or AG490 or ppYLKTK.tw.
- 8 AMPK activ\* or metformin or DS79182026.tw.
- 9 IL-6 inhibi\* or interleukin-6 inhibi\* or toclizumab or siltuximab.tw.
- 10 IL-1 inhibi\* or interleukin 1 inhibi\* or canakinumab.tw. 1372
- 11 erythroferron\*.tw.
- 12 Prolyl-Hydroxylase Inhibitors/ or hypoxia inducible factor prolyl hydroxylase inhibitors.mp. or Hypoxia-Inducible Factor-Proline Dioxygenases/
- 13 hypoxia inducible factor stabili\*er\*.tw.
- 14 roxadustat.tw.
- 15 daprodustat.tw.
- 16 vadadustat.tw.
- 17 molidustat.tw.
- 18 enarodustat.tw.
- 19 desidustat.tw.
- 20 FG-4592.tw.
- 21 ASP1517.tw.
- 22 AZD9941.tw.
- 23 BAY85-3934.tw.
- 24 GSK1278863.tw.
- 25 AKB-6548.tw.
- 26 JTZ-951.tw.
- 27 ZYAN-1.tw.
- 28 ferroportin stabili\*er\* or ferroportin agonist\* or LY298057 or fursultiamine.tw.
- 29 anticalin\* or hepcidin binding protein\* or PRS-080.tw.
- 30 antihepcidin antibod\* or A12B9m or Ly2787106.tw.
- 31 hepcidin spiegelmer\* or hepcidin binding L-RNA aptamer\* or lexapetid pegol NOX-H94.tw. 2
- 32 (short interfering RNA or shRNA or siRNA or short hairpin RNA or H6 or H10 or ALN-HPN) and hepcidin.mp.
- 33 activin like kinase receptor inhibi\* or ALK2 inhibi\* or ALK3 inhibi\* or OD66 or TP-0184 or INCB00928 or momelotinib or indazole or DS79182026.tw.
- 34 bone morphogenic protein type 1 receptor inhibi\* or BMP type 1 receptor inhibi\* or dorsomorphin or LDN-193189 or LDN-212854.tw.
- 35 BMP6 inhibi\* or bone morphogenic protein 6 inhibi\* or imatinib or spironolactone.tw.
- 36 hemojuvelin inhibi\* or hemojuvelin antibod\* or sHJV or h5F923 or h5F9-AM or ABT-207.tw.
- 37 transferrin receptor RNAi.tw.
- 38 7 or 8 or 9 or 10 or 11 or 12 or 13 or 14 or 15 or 16 or 17 or 18 or 19 or 20 or 21 or 22 or 23 or 24 or 25 or 26 or 27 or 28 or 29 or 30 or 31 or 32 or 33 or 34 or 35 or 36 or 37
- 39 5 and 38
- 40 6 or 39

1  
2  
3 41 limit 40 to (humans and yr="2010 -Current")  
4  
5  
6

7 **Embase Classic + Embase:**

8 1 iron defic\*.ti.  
9 2 an\*emia not (leuk\*emia or h\*emolytic or sickle or malaria or myelodysplas\* or  
10 sideroblast\* or thalassemia\*).ti.  
11 3 h\*emoglobin.tw.  
12 4 treatment\* or therap\* or drug\* or pharm\*.tw.  
13 5 1 or 2  
14 6 5 and 3 and 4  
15 7 STAT3 inhibi\* or AG490 or ppYLKTK.tw.  
16 8 AMPK activ\* or metformin or DS79182026.tw.  
17 9 IL-6 inhibi\* or interleukin-6 inhibi\* or toclizumab or siltuximab.tw.  
18 10 IL-1 inhibi\* or interleukin 1 inhibi\* or canakinumab.tw. 1372  
19 11 erythroferon\*.tw.  
20 12 Prolyl-Hydroxylase Inhibitors/ or hypoxia inducible factor prolyl hydroxylase  
21 inhibitors.mp. or Hypoxia-Inducible Factor-Proline Dioxygenases/  
22 13 hypoxia inducible factor stabili\*er\*.tw.  
23 14 roxadustat.tw.  
24 15 daprodustat.tw.  
25 16 vadadustat.tw.  
26 17 molidustat.tw.  
27 18 enarodustat.tw.  
28 19 desidustat.tw.  
29 20 FG-4592.tw.  
30 21 ASP1517.tw.  
31 22 AZD9941.tw.  
32 23 BAY85-3934.tw.  
33 24 GSK1278863.tw.  
34 25 AKB-6548.tw.  
35 26 JTZ-951.tw.  
36 27 ZYAN-1.tw.  
37 28 ferroportin stabili\*er\* or ferroportin agonist\* or LY298057 or fursultiamine.tw.  
38 29 anticalin\* or hepcidin binding protein\* or PRS-080.tw.  
39 30 antihepcidin antibod\* or A12B9m or Ly2787106.tw.  
40 31 hepcidin spiegelmer\* or hepcidin binding L-RNA aptamer\* or lexapetid pegol NOX-  
41 H94.tw. 2  
42 32 (short interfering RNA or shRNA or siRNA or short hairpin RNA or H6 or H10 or  
43 ALN-HPN) and hepcidin.mp.  
44 33 activin like kinase receptor inhibi\* or ALK2 inhibi\* or ALK3 inhibi\* or OD66 or  
45 TP-0184 or INCB00928 or momelotinib or indazole or DS79182026.tw.  
46 34 bone morphogenic protein type 1 receptor inhibi\* or BMP type 1 receptor inhibi\* or  
47 dorsomorphin or LDN-193189 or LDN-212854.tw.  
48 35 BMP6 inhibi\* or bone morphogenic protein 6 inhibi\* or imatinib or  
49 spironolactone.tw.  
50 36 hemojuvelin inhibi\* or hemojuvelin antibod\* or sHJV or h5F923 or h5F9-AM or  
51 ABT-207.tw.  
52 37 transferrin receptor RNAi.tw.  
53  
54  
55  
56  
57  
58  
59  
60

- 1  
2  
3 38 7 or 8 or 9 or 10 or 11 or 12 or 13 or 14 or 15 or 16 or 17 or 18 or 19 or 20 or 21 or 22  
4 or 23 or 24 or 25 or 26 or 27 or 28 or 29 or 30 or 31 or 32 or 33 or 34 or 35 or 36 or 37  
5  
6 39 5 and 38  
7  
8 40 6 or 39  
9  
10 41 limit 40 to (humans and yr="2010 -Current")  
11

## Scopus

- 12  
13 1. TITLE-ABS-KEY  
14 (treatment OR therap\* OR pharm\* OR safe\* OR efficacy OR drug\*) AND  
15 2. TITLE (an\*emia) OR TITLE ( "iron defic\*" ) AND  
16 3. TITLE-ABS-KEY ( h\*emoglobin ) OR  
17 4. TITLE-ABS-KEY ( "stat3 inhibi\*" OR "ag490" OR "ppylktk" "ampk  
18 activ\*" OR "metformin" OR "ds78182026" OR "il-6 inhibi\*" OR "interleukin-6  
19 inhibi\*" OR "tocilizumab" OR "siltuximab" OR "il-1 inhibi\*" OR "interleukin 1  
20 inhibi\*" OR "canakinumab" OR "erythroferon\*" OR "prolyl hydroxylase  
21 inhibi\*" OR "hypoxia inducible factor prolyl hydroxylase inhibi\*" OR "hypoxia  
22 inducible factor proline dioxygenase\*" OR "hif prolyl hydroxylase  
23 inhibi\*" OR "hypoxia inducible factor  
24 stabili\*er\*" OR "roxadustat" OR "daprodustat" OR "vadadustat" OR "molidustat  
25 " OR "enarodustat" OR "desidustat" OR "fg-  
26 4592" OR "asp1517" OR "azd9941" OR "bay85-  
27 3934" OR "gsk1278863" OR "akb-6548" OR "jtz-951" OR "zyan-  
28 1" OR "ferroportin stabili\*er\*" OR "ferroportin  
29 agonist\*" OR "ly298057" OR "fursultiamine" OR "anticalin\*" OR "hepcidin  
30 binding protein\*" OR "prs-080" OR "antihepcidin  
31 antibod\*" OR "a12b9m" OR "ly2787106" OR "hepcidin  
32 spiegelmer\*" OR "hepcidin binding l-rna aptamer\*" OR "lexapetid pegol nox-  
33 h94" OR "short interfering rna" OR "shrna" OR "sirna" OR "short hairpin  
34 rna" OR "activin like kinase receptor inhibi\*" OR "alk2 inhibi\*" OR "alk3  
35 inhibi\*" OR "od66" OR "tp-  
36 0184" OR "incb00928" OR "momelotinib" OR "indazole" OR "ds79182026" O  
37 R "bone morphogenic protein type 1 receptor inhibi\*" OR "bmp type 1 receptor  
38 inhibi\*" OR "dorsomprhin" OR "ldn-193189" OR "ldn-  
39 212854" OR "hemojuvelin  
40 inhibi\*" OR "shjv" OR "imatinib" OR "spironolactone" OR "h5f923" OR "h5f  
41 9-am" OR "abt-207" OR "transferrin receptor rna" AND "an\*emia" ) AND  
42  
43 5. PUBYEAR > 2009  
44  
45  
46  
47  
48  
49  
50  
51  
52  
53  
54  
55  
56  
57  
58  
59  
60



## Data extraction form

|                          |                                                                                                                                                                                                                                                      |                          |            |     |              |
|--------------------------|------------------------------------------------------------------------------------------------------------------------------------------------------------------------------------------------------------------------------------------------------|--------------------------|------------|-----|--------------|
| Date:                    | Investigator: AD PD CD LM                                                                                                                                                                                                                            | DOI                      |            |     |              |
| Title                    |                                                                                                                                                                                                                                                      |                          |            |     |              |
| Author (s)               |                                                                                                                                                                                                                                                      |                          |            |     |              |
| Citation                 |                                                                                                                                                                                                                                                      |                          |            |     |              |
| Year of pub.             | Country                                                                                                                                                                                                                                              | Pub. Type                |            |     |              |
| Research question        |                                                                                                                                                                                                                                                      |                          |            |     |              |
| Outcomes                 |                                                                                                                                                                                                                                                      |                          |            |     |              |
| Population               |                                                                                                                                                                                                                                                      |                          |            |     |              |
| Inclusion criteria       | <input type="checkbox"/> adult pts (>18 y/o) <input type="checkbox"/> anemia <input type="checkbox"/> novel agents                                                                                                                                   |                          |            |     |              |
| Exclusion criteria       | <input type="checkbox"/> anemia 2'another hematological condition <input type="checkbox"/> primary bone marrow disorder<br><input type="checkbox"/> renal disease <input type="checkbox"/> hemolysis <input type="checkbox"/> infection e.g. malaria |                          |            |     |              |
| Setting                  |                                                                                                                                                                                                                                                      |                          |            |     |              |
| Sample size              |                                                                                                                                                                                                                                                      |                          |            |     |              |
| Methodology              | <input type="checkbox"/> prospective <input type="checkbox"/> retrospective <input type="checkbox"/> blinded <input type="checkbox"/> open label <input type="checkbox"/> randomized<br><input type="checkbox"/> non- randomized                     |                          |            |     |              |
| Intervention             |                                                                                                                                                                                                                                                      |                          |            |     |              |
| Comparator               | <input type="checkbox"/> placebo <input type="checkbox"/> SOC <input type="checkbox"/> ESA <input type="checkbox"/> PO iron <input type="checkbox"/> IV iron <input type="checkbox"/> no comparator                                                  |                          |            |     |              |
| Duration of intervention |                                                                                                                                                                                                                                                      |                          |            |     |              |
| Outcome and measures:    |                                                                                                                                                                                                                                                      |                          |            |     |              |
| Timepoints               | Baseline                                                                                                                                                                                                                                             | 1                        | 2          | End | Significance |
| Δ Hb                     |                                                                                                                                                                                                                                                      |                          |            |     |              |
| Δ Ferritin               |                                                                                                                                                                                                                                                      |                          |            |     |              |
| Δ T sats                 |                                                                                                                                                                                                                                                      |                          |            |     |              |
| Δ hepcidin               |                                                                                                                                                                                                                                                      |                          |            |     |              |
| Major AE                 | Minor AE                                                                                                                                                                                                                                             |                          | Admin comp |     |              |
| HRQL                     | Y/N                                                                                                                                                                                                                                                  | Disability free survival |            |     |              |
| Functional status        | DAAAH                                                                                                                                                                                                                                                |                          |            |     |              |
| Mortality                | Complications                                                                                                                                                                                                                                        |                          |            |     |              |
| LOS                      | Health care costs                                                                                                                                                                                                                                    |                          |            |     |              |

**PRISMA-P (Preferred Reporting Items for Systematic review and Meta-Analysis Protocols) 2015 checklist: recommended items to address in a systematic review protocol\***

| Section and topic                 | Item No | Checklist item                                                                                                                                                                                                                | Information reported (Y/N) | Page(s)     |
|-----------------------------------|---------|-------------------------------------------------------------------------------------------------------------------------------------------------------------------------------------------------------------------------------|----------------------------|-------------|
| <b>ADMINISTRATIVE INFORMATION</b> |         |                                                                                                                                                                                                                               |                            |             |
| Title:                            |         |                                                                                                                                                                                                                               |                            |             |
| Identification                    | 1a      | Identify the report as a protocol of a systematic review                                                                                                                                                                      | Y                          | 1           |
| Update                            | 1b      | If the protocol is for an update of a previous systematic review, identify as such                                                                                                                                            | NA                         | NA          |
| Registration                      | 2       | If registered, provide the name of the registry (such as PROSPERO) and registration number                                                                                                                                    | Y                          |             |
| Authors:                          |         |                                                                                                                                                                                                                               |                            |             |
| Contact                           | 3a      | Provide name, institutional affiliation, e-mail address of all protocol authors; provide physical mailing address of corresponding author                                                                                     | Y                          | 2           |
| Contributions                     | 3b      | Describe contributions of protocol authors and identify the guarantor of the review                                                                                                                                           | Y                          | 20          |
| Amendments                        | 4       | If the protocol represents an amendment of a previously completed or published protocol, identify as such and list changes; otherwise, state plan for documenting important protocol amendments                               | NA                         | NA          |
| Support:                          |         |                                                                                                                                                                                                                               |                            |             |
| Sources                           | 5a      | Indicate sources of financial or other support for the review                                                                                                                                                                 | Y                          | 20          |
| Sponsor                           | 5b      | Provide name for the review funder and/or sponsor                                                                                                                                                                             | NA                         | 20          |
| Role of sponsor or funder         | 5c      | Describe roles of funder(s), sponsor(s), and/or institution(s), if any, in developing the protocol                                                                                                                            | Y                          | 20          |
| <b>INTRODUCTION</b>               |         |                                                                                                                                                                                                                               |                            |             |
| Rationale                         | 6       | Describe the rationale for the review in the context of what is already known                                                                                                                                                 | Y                          | 6           |
| Objectives                        | 7       | Provide an explicit statement of the question(s) the review will address with reference to participants, interventions, comparators, and outcomes (PICO)                                                                      | Y                          | 8           |
| <b>METHODS</b>                    |         |                                                                                                                                                                                                                               |                            |             |
| Eligibility criteria              | 8       | Specify the study characteristics (such as PICO, study design, setting, time frame) and report characteristics (such as years considered, language, publication status) to be used as criteria for eligibility for the review | Y                          | 9-13        |
| Information sources               | 9       | Describe all intended information sources (such as electronic databases, contact with study authors, trial registers or other grey literature sources) with planned dates of coverage                                         | Y                          | 13          |
| Search strategy                   | 10      | Present draft of search strategy to be used for at least one electronic database, including planned limits, such that it could be repeated                                                                                    | Y                          | Sup. file 1 |

1  
2  
3  
4  
5  
6  
7  
8  
9  
10  
11  
12  
13  
14  
15  
16  
17  
18  
19  
20  
21  
22  
23  
24  
25  
26  
27  
28  
29  
30  
31  
32  
33  
34  
35  
36  
37  
38  
39  
40  
41  
42  
43  
44  
45  
46

|                                    |     |                                                                                                                                                                                                                                                           |    |       |
|------------------------------------|-----|-----------------------------------------------------------------------------------------------------------------------------------------------------------------------------------------------------------------------------------------------------------|----|-------|
| Study records:                     |     |                                                                                                                                                                                                                                                           |    |       |
| Data management                    | 11a | Describe the mechanism(s) that will be used to manage records and data throughout the review                                                                                                                                                              | Y  | 14    |
| Selection process                  | 11b | State the process that will be used for selecting studies (such as two independent reviewers) through each phase of the review (that is, screening, eligibility and inclusion in meta-analysis)                                                           | Y  | 15    |
| Data collection process            | 11c | Describe planned method of extracting data from reports (such as piloting forms, done independently, in duplicate), any processes for obtaining and confirming data from investigators                                                                    | Y  | 15    |
| Data items                         | 12  | List and define all variables for which data will be sought (such as PICO items, funding sources), any pre-planned data assumptions and simplifications                                                                                                   | Y  | 15-16 |
| Outcomes and prioritization        | 13  | List and define all outcomes for which data will be sought, including prioritization of main and additional outcomes, with rationale                                                                                                                      | Y  | 16-17 |
| Risk of bias in individual studies | 14  | Describe anticipated methods for assessing risk of bias of individual studies, including whether this will be done at the outcome or study level, or both; state how this information will be used in data synthesis                                      | Y  | 17    |
| Data synthesis                     | 15a | Describe criteria under which study data will be quantitatively synthesised                                                                                                                                                                               | Y  | 18    |
|                                    | 15b | If data are appropriate for quantitative synthesis, describe planned summary measures, methods of handling data and methods of combining data from studies, including any planned exploration of consistency (such as I <sup>2</sup> , Kendall's $\tau$ ) | NA |       |
|                                    | 15c | Describe any proposed additional analyses (such as sensitivity or subgroup analyses, meta-regression)                                                                                                                                                     | NA |       |
|                                    | 15d | If quantitative synthesis is not appropriate, describe the type of summary planned                                                                                                                                                                        | Y  | 18    |
| Meta-bias(es)                      | 16  | Specify any planned assessment of meta-bias(es) (such as publication bias across studies, selective reporting within studies)                                                                                                                             | NA | 18    |
| Confidence in cumulative evidence  | 17  | Describe how the strength of the body of evidence will be assessed (such as GRADE)                                                                                                                                                                        | NA | 18    |

**\* It is strongly recommended that this checklist be read in conjunction with the PRISMA-P Explanation and Elaboration (cite when available) for important clarification on the items. Amendments to a review protocol should be tracked and dated. The copyright for PRISMA-P (including checklist) is held by the PRISMA-P Group and is distributed under a Creative Commons Attribution Licence 4.0.**

*From: Shamseer L, Moher D, Clarke M, Ghersi D, Liberati A, Petticrew M, Shekelle P, Stewart L, PRISMA-P Group. Preferred reporting items for systematic review and meta-analysis protocols (PRISMA-P) 2015: elaboration and explanation. BMJ. 2015 Jan 2;349(jan02 1):g7647.*

# BMJ Open

## Non-erythropoiesis stimulating agent, non-iron therapies for the management of anaemia: protocol for a scoping review

|                                 |                                                                                                                                                                                                                                                                                                                                                                                            |
|---------------------------------|--------------------------------------------------------------------------------------------------------------------------------------------------------------------------------------------------------------------------------------------------------------------------------------------------------------------------------------------------------------------------------------------|
| Journal:                        | <i>BMJ Open</i>                                                                                                                                                                                                                                                                                                                                                                            |
| Manuscript ID                   | bmjopen-2021-059059.R1                                                                                                                                                                                                                                                                                                                                                                     |
| Article Type:                   | Protocol                                                                                                                                                                                                                                                                                                                                                                                   |
| Date Submitted by the Author:   | 27-Feb-2022                                                                                                                                                                                                                                                                                                                                                                                |
| Complete List of Authors:       | Devlin, Paula; The University of Melbourne, Department of Critical Care<br>Davies, Amelia; The University of Western Australia, Department of Surgery<br>Dugan, Cory; The University of Western Australia, Department of Surgery<br>Richards, Toby; The University of Western Australia, Department of Surgery<br>Miles, Lachlan; The University of Melbourne, Department of Critical Care |
| <b>Primary Subject Heading</b>: | Anaesthesia                                                                                                                                                                                                                                                                                                                                                                                |
| Secondary Subject Heading:      | Haematology (incl blood transfusion), Surgery                                                                                                                                                                                                                                                                                                                                              |
| Keywords:                       | Anaemia < HAEMATOLOGY, Adult anaesthesia < ANAESTHETICS, Blood bank & transfusion medicine < HAEMATOLOGY, SURGERY                                                                                                                                                                                                                                                                          |
|                                 |                                                                                                                                                                                                                                                                                                                                                                                            |

SCHOLARONE™  
Manuscripts

1  
2  
3 **Non-erythropoiesis stimulating agent, non-iron therapies for the management of**  
4 **anaemia: protocol for a scoping review**  
5  
6  
7  
8  
9

10 *Paula Devlin, Amelia Davies, Cory Dugan, Toby Richards, and Lachlan F. Miles*  
11  
12  
13

14 **AUTHORS**  
15

16 **Paula Devlin**  
17

18  
19 Department of Critical Care, Faculty of Medicine, Dentistry and Health Sciences, The  
20 University of Melbourne, Melbourne, Australia  
21  
22  
23  
24  
25

26 **Amelia Davies**  
27

28 Division of Surgery, Medical School, University of Western Australia, Perth, Australia  
29  
30  
31  
32

33 **Cory Dugan**  
34

35 Division of Surgery, Medical School, University of Western Australia, Perth, Australia  
36  
37  
38  
39

40 **Toby Richards**  
41

42 Division of Surgery, Medical School, University of Western Australia, Perth, Australia  
43  
44  
45  
46

47 **Lachlan F. Miles**  
48

49 Department of Critical Care, Faculty of Medicine, Dentistry and Health Sciences, The  
50 University of Melbourne, Melbourne, Australia  
51  
52  
53  
54  
55  
56  
57  
58  
59  
60

1  
2  
3 Corresponding author: Paula Devlin  
4  
5 Department of Critical Care  
6  
7 Faculty of Medicine, Dentistry and Health Sciences  
8  
9 The University of Melbourne  
10  
11 Grattan Street, Parkville,  
12  
13 Victoria, 3010, Australia  
14  
15  
16  
17  
18

19 Email: paulamargare@student.unimelb.edu.au  
20  
21 22465712@student.uwa.edu.au  
22  
23 cory.dugan@researchg.uwa.edu.au  
24  
25 lachlan.miles@unimelb.edu.au  
26  
27 toby.richards@uwa.edu.au  
28  
29  
30  
31

32  
33 Keywords: Anaemia; Inflammation; Hypoxia Inducing Factors; Heparin  
34  
35  
36  
37  
38  
39  
40  
41  
42  
43  
44  
45  
46  
47  
48  
49  
50  
51  
52  
53  
54  
55  
56  
57  
58  
59  
60

## ABSTRACT

### Introduction

Pre-operative anaemia is associated with poor postoperative outcomes and is the strongest predictor of allogenic blood transfusion, which contributes further to patient morbidity. Emphasis has been placed on correcting anaemia prior to surgery to mitigate these outcomes. Conflicting evidence exists regarding the benefit of currently recommended interventions. With greater understanding of iron haemostasis and erythropoiesis, novel therapies have been identified. These are at varying stages of development with some demonstrating promising results in patients with chronic kidney disease. It is not known how these agents have been studied outside this population, particularly in the peri-operative context. To address this, we will conduct a scoping review of the published literature to chart the evidence.

### Methods and analysis

The scoping review will be reported according to the Preferred Reporting Items for Systematic Reviews and Meta-Analyses Extension for Scoping Reviews framework. The electronic database search will include Scopus, MEDLINE (Ovid) and Excerpta Medica database (Ovid), with no language restrictions and will include all publications since January 1 2010. This review will have three objectives; (1) describe the mechanisms of action for novel agents; (2) describe the level of evidence and stage of development of novel agents in a perioperative setting; and (3) determine the potential agents suitable for prospective controlled trials in a pre- or postoperative patient cohort and aiming to improve patient centred outcomes. The review process will involve two reviewers with a third reviewer resolving disagreements. Data will be extracted and organised with subsequent analysis.

### **Ethics and dissemination**

This scoping review does not require research ethics approval. The results will be published in a peer-reviewed journal and inform the development of future prospective trials based on established evidence from potential therapeutic agents.

### **Registration**

This protocol has been registered prospectively on the Open Science Framework registry (DOI:10.17605/OSF.IO/SM3UH; [https://osf.io/sm3uh/?view\\_only=39876ccf7a4348dfbd566535b957a7db](https://osf.io/sm3uh/?view_only=39876ccf7a4348dfbd566535b957a7db)).

### **Strengths and limitations of this study**

- The exclusion of papers published prior to 2010 will focus the study on contemporary evidence specific to our research aims; namely, the stage of development of novel drugs.
- The exclusion of studies related to patients with chronic kidney disease will limit indirectness in assessing the evidence outside this population.
- The exclusion of the chronic kidney disease population from our search may in turn limit the results yielded and thus the applicability of our results.
- The scoping review methodology will reflect the extent of gaps in the literature, however, will lack the robustness of a traditional systematic review with meta-analysis.



## INTRODUCTION

### Rationale

While the global prevalence of anaemia is decreasing, the global burden of disease remains high. Approximately 25% of the general population have anaemia (1), which has been associated with worse outcomes and greater health care costs across a range of specific patient populations.(1-7) There is an independent association between pre-operative anaemia and worse postoperative outcomes.(5, 8-10) Pre-operative anaemia is also the strongest predictor of allogeneic red cell transfusion, which is also associated with worse postoperative outcomes, including risk of delirium, wound complications, sepsis, acute kidney injury and increased length of hospital stay.(11, 12) Absolute or functional iron deficiency (and by extension the ‘anaemia of inflammation’ [AOI]) is the underlying cause of anaemia in most hospitalised patients.(13) AOI occurs due to disruption of the hepcidin-ferroportin axis resulting in iron restricted erythropoiesis, functional iron deficiency and anaemia despite ‘sufficient’ iron stores.(11, 14) AOI confers a poorer prognosis and worsens quality of life.(14, 15)

Renal medicine has treated anaemia previously as a modifiable risk factor that can be targeted to improve patient outcomes. Indeed, intravenous iron and erythropoietin stimulating agents (ESAs) are now standard of care when haemoglobin concentration falls below 100 g/L in this cohort.(9, 16) Intravenous iron has since been shown to improve biochemical and patient centred outcome measures in patients with anaemia without renal disease; however, these results are yet to be translated consistently to the surgical setting.(17-24) As an example, a 2019 Cochrane review and meta-analysis by Ng *et al.* concluded there was no difference in transfusion rates between those who did and those who did not receive iron prior to surgery.(25) These results differ to previous studies in specific surgical populations investigating the same intervention.(26-28) Furthermore, this conclusion contradicts a meta-analysis performed in

1  
2  
3 2013 which – while having a higher sample size – was not restricted to the peri-operative  
4 setting.(29) More recently, the PREVENTT trial reported similar results in a larger sample.(30)  
5  
6 Like Ng *et al.*, the PREVENTT investigators concluded that pre-operative intravenous iron  
7  
8 was not superior to placebo in reducing the need for blood transfusion or death in patients with  
9  
10 anaemia prior to open, major, elective abdominal surgery. This evidence suggests that  
11  
12 intravenous iron in isolation, to reduce allogenic blood transfusion and subsequent poor patient  
13  
14 outcomes, is an inadequate management option for the anaemia of inflammation commonly  
15  
16 seen in the surgical setting. ESAs similarly improve biochemical outcomes outside the renal  
17  
18 population; however, implementation as part of wider patient blood management programs has  
19  
20 been limited in recent years due to the perceived increased risks of thrombosis, stroke, and  
21  
22 mortality and – particularly in Australia – the lack of a government pharmaceutical subsidy for  
23  
24 this indication.(31) Kei *et al.* addressed some of these concerns with a meta-analysis conducted  
25  
26 in 2019 that reviewed the relative efficacy and safety of ESA and iron (as recommended in  
27  
28 guidelines) vs iron alone.(31) While limited by significant heterogeneity and potential  
29  
30 confounding from the inclusion of studies with non-anaemic patients, their results suggest a  
31  
32 reduced risk of allogenic red cell transfusion in the intervention group. Importantly, their  
33  
34 analysis noted no difference regarding safety.  
35  
36  
37  
38  
39  
40  
41  
42  
43  
44

45 Given the heterogeneous results of trials examining intravenous iron as an intervention for  
46  
47 anaemia in surgical patients and the lack of uptake of ESAs as part of standard practice,  
48  
49 attention has shifted to novel agents that purport to treat the causes of anaemia (particularly the  
50  
51 anaemia of inflammation) more directly. These agents have varied mechanisms of action that  
52  
53 attempt to balance the multifactorial nature of anaemia in a multimorbid patients.(32-37) Trials  
54  
55 of one such class of agents, the hypoxia inducible factor – prolyl hydroxylase inhibitors (HIF-  
56  
57 PHIs) have suggested that these agents improve haemoglobin concentration reliably in the  
58  
59  
60

1  
2  
3 chronic kidney disease (CKD) population.(38-41) However, a recent meta-analysis concluded  
4 that while HIF-PHIs demonstrate biochemical efficacy and safety, they lack evidence of benefit  
5 for patient-centred outcome measures.(42) Trials in individual agents (Vadadustat and  
6 Daprodustat) do suggest non inferiority when compared to ESAs, but are inconsistent in  
7 regards to safety.(43, 44) Furthermore, it is unclear what studies have been conducted in a  
8 population outside of patients with CKD. As such, a scoping review of the literature is  
9 necessary to chart the available evidence for novel therapeutics (that is, non-ESA, non-iron  
10 therapies) in the management of anaemia in non-CKD patient cohorts.  
11  
12  
13  
14  
15  
16  
17  
18  
19  
20  
21  
22  
23

## 24 **Objectives**

25  
26 The objectives of this scoping review will be to identify, appraise and map the existing evidence  
27 for any available non-ESA, non-iron agents that can be utilised in patients with pre-operative  
28 anaemia to improve outcomes, guide future research and determine the need for a full  
29 systematic review and meta-analysis. The proposed review will therefore answer the following  
30 questions:  
31  
32  
33  
34  
35  
36  
37

- 38 1. What are the described mechanisms of action for non-ESA, non-iron therapies to  
39 increase haemoglobin?  
40  
41
- 42 2. What is the level of evidence and stage of development for non-ESA, non-iron novel  
43 anaemia therapies in a peri-operative setting?  
44  
45  
46
- 47 3. Which potential agents are suitable for prospective controlled trials in a pre- or  
48 postoperative patient cohort with aims to improve peri-operative patient centred outcomes  
49 (including patient-centred outcome measures)?  
50  
51  
52  
53  
54  
55  
56  
57  
58  
59  
60

## METHODS AND ANALYSIS

This protocol draws from the Preferred Reporting Items for Systematic Review and Meta-Analysis – Protocols 2015 (PRISMA-P) checklist (45) and is refined for reporting via the application of the Preferred Reporting Items for Systematic Reviews and Meta-Analyses Extension for Scoping Reviews (PRISMA-ScR).(46) Where aspects of the PRISMA-P checklist are not applicable, a brief discussion and rationale for exclusion will be given. In the event of a protocol amendments, the date of the amendment will be accompanied by a description of the change and the rationale in the listing on the Open Science Framework Registry.

### Eligibility Criteria

We have used a PICO format to develop our eligibility criteria and outline our outcome measures:

#### Population

We will include studies examining adults  $\geq 18$  years of age with anaemia. Given the varied definition of anaemia used in reporting and to ensure we capture all relevant literature we will define anaemia as any haemoglobin concentration  $< 130$  g/L regardless of sex.(47, 48) Studies in which anaemia is caused by primary renal dysfunction, infection (i.e., malaria) or haemolysis will be excluded. Studies will be excluded if the patient population is restricted to a specific haematological disorder such as sickle cell disease; thalassaemia subgroups; sideroblastic anaemia; haematological malignancy and primary disease of the bone marrow such as myelodysplasia. Any study not performed in humans will be excluded.

#### Intervention

All studies in which anaemia is treated using a non-ESA or iron-based therapy will be reviewed. Primarily, novel agents (those that are neither marketed nor utilised for another primary

1  
2  
3 indication) will be sought. Examples of such interventions and their mechanisms of action are  
4  
5 shown in Table 1. Studies that utilise a novel agent in addition to standard or routine care will  
6  
7 be included.  
8  
9

#### 10 Comparison

11 Comparisons will be made to iron preparations (oral or intravenous), ESAs, routine care (i.e.,  
12  
13 no intervention in addition to standard management) or placebo. We will include studies that  
14  
15 do not have a defined comparator for appraisal and charting as appropriate in line with the  
16  
17 scoping review methodology  
18  
19  
20  
21

#### 22 Outcome

23 We recognise the recent development of standardised outcome measures defined by the  
24  
25 COMPAC-StEP group as the current standard for research in peri-operative medicine;  
26  
27 however, as the development of these measures is relatively recent, it is unlikely that many  
28  
29 studies will have been performed utilising these endpoints.<sup>(49)</sup> As such, biochemical  
30  
31 surrogates will be used to determine efficacy, and the potential for further study of identified  
32  
33 agents in a peri-operative context. Where available, patient-related outcomes will be included  
34  
35 in the evidence mapping. Similarly, where possible, the total duration of follow-up, as well as  
36  
37 the various timepoints used for follow-up during the study will be recorded. Outcomes will be  
38  
39 collected as reported. Therefore, we will analyse and grade each agent on the following  
40  
41 endpoints:  
42  
43  
44  
45  
46

#### 47 Primary outcome:

- 48  
49 • Change in haemoglobin concentration between start of intervention and end of follow-  
50  
51 up (g/L).

#### 52 Secondary outcome:

- 53  
54 • Biochemical: Change in ferritin and transferrin saturations; change in hepcidin level;  
55  
56  
57  
58  
59  
60

- Patient centred outcomes: health-related quality of life, disability free survival, functional status, days alive and at home, complications, mortality;
- Healthcare resource utilisation: length of stay, health care costs of treatment;
- Safety: post administration complications, major and minor adverse effects.

For peer review only

| Table 1<br>Mechanism of action and physiological target of novel therapeutic agents for treatment of anaemia                         |                                                                                                                                                                                                                                                                                        |                                                                                                                                                                                                                                                                                                                                                                                                                      |
|--------------------------------------------------------------------------------------------------------------------------------------|----------------------------------------------------------------------------------------------------------------------------------------------------------------------------------------------------------------------------------------------------------------------------------------|----------------------------------------------------------------------------------------------------------------------------------------------------------------------------------------------------------------------------------------------------------------------------------------------------------------------------------------------------------------------------------------------------------------------|
| Class agent                                                                                                                          | Mechanism                                                                                                                                                                                                                                                                              | Relevant physiology                                                                                                                                                                                                                                                                                                                                                                                                  |
| <b>Agents that directly antagonise the effects of hepcidin</b>                                                                       |                                                                                                                                                                                                                                                                                        |                                                                                                                                                                                                                                                                                                                                                                                                                      |
| <b>Anticalins (hepcidin binding proteins)</b><br><i>PRS-080</i>                                                                      | Pegylated lipocalin like proteins engineered to bind hepcidin thereby preventing adequate binding to ferroportin.                                                                                                                                                                      | Overproduction of hepcidin due to aberrant inflammatory signals leads to increased ferroportin degradation and reduced iron absorption from the diet leading to iron restricted erythropoiesis and anaemia                                                                                                                                                                                                           |
| <b>Antihepcidin antibodies</b><br><i>AB12B9m, LY2787106</i>                                                                          | Humanised monoclonal antibodies that bind hepcidin with high affinity causing degradation                                                                                                                                                                                              |                                                                                                                                                                                                                                                                                                                                                                                                                      |
| <b>Spiegelmers (hepcidin-binding L-RNA Aptamers)</b><br><i>Lexaptepid pegol – NOX-H94</i>                                            | Blocks hepcidin induced ferroportin internalisation<br>L enantiomers of oligonucleotide that interact like antibodies binding human hepcidin and blocking its function                                                                                                                 |                                                                                                                                                                                                                                                                                                                                                                                                                      |
| <b>Short Interfering and Short Hairpin RNA (siRNA and shRNA)</b><br><i>H6, H10, ALN-HPN</i>                                          | RNA based technology leading to hepcidin gene silencing thereby reducing production of hepcidin Mrna                                                                                                                                                                                   |                                                                                                                                                                                                                                                                                                                                                                                                                      |
| <b>Agents that interact with the BMP6-HJV-SMAD signalling cascade</b>                                                                |                                                                                                                                                                                                                                                                                        |                                                                                                                                                                                                                                                                                                                                                                                                                      |
| <b>ALK2/3 (activin-like kinase receptor) inhibitors</b><br><i>OD66, TP-0184, INCB00928, Momelotinib, Indazole, DS79182026 (ALK3)</i> | Inhibition of the ALK2/3 receptors (a form of BMP receptor) prevents coupling with HJV and BMP6 thereby reducing intracellular signalling for hepcidin expression = decreased hepcidin production                                                                                      | Hemojuvelin (HJV) is a bone morphogenetic protein (BMP) co receptor<br><br>High iron stimulates binding of circulating BMP6 to BMP receptor types I and II with co-receptor HJV on the hepatocyte membrane. This stable multiplex causes the activation of SMAD signal cascade<br>Intracellular SMAD1/5/8 proteins complex with SMAD4 that then translocates to the nucleus causing induction of hepcidin expression |
| <b>Inhibitors of BMP type 1 receptor</b><br><i>Dorsomorphin, LDN-193189, LDN-212854</i>                                              | Inhibit BMP-, HJV-, and IL-6-stimulated hepcidin expression in hepatocytes and block iron induced hepcidin mRNA<br>- Dorsomorphin is also a nonselective kinase inhibitor of AMP kinase (off-target effects)<br>- LDN-193189 with increased potency and selectivity for BMP inhibition |                                                                                                                                                                                                                                                                                                                                                                                                                      |
| <b>BMP6 sequestering agents</b><br><i>Anticoagulant and non-anticoagulant hepcidins</i>                                              | Sequester BMP activity, inhibit BMP6-mediated hepcidin transcription and decrease SMAD phosphorylation thereby reducing hepcidin expression                                                                                                                                            |                                                                                                                                                                                                                                                                                                                                                                                                                      |
| <b>Hemojuvelin (BMP co-receptor)</b><br><i>sHJV.Fc, h5F9.23, h5F9-AM, ABT-207</i>                                                    | Antibodies that cause cleavage of hemojuvelin and interferes with BMP binding to the BMPR thereby decreasing hepcidin transcription.                                                                                                                                                   |                                                                                                                                                                                                                                                                                                                                                                                                                      |
| <b>Transferrin receptor (TRF2)</b><br><i>RNAi</i>                                                                                    | Experimental gene silencing technology aimed towards the transferrin receptor                                                                                                                                                                                                          |                                                                                                                                                                                                                                                                                                                                                                                                                      |

| <b>Agents that interact with the IL-6/STAT3 signalling pathway</b>                                                                                                                                                                                                                                                                                                                                                                                                                                                                                                                                                            |                                                                                                                                                                                                                                                                                        |                                                                                                                                                                                                                                                                                                                                                                                                                                                                                                                                                                                                                                                                                                                                                                                                         |
|-------------------------------------------------------------------------------------------------------------------------------------------------------------------------------------------------------------------------------------------------------------------------------------------------------------------------------------------------------------------------------------------------------------------------------------------------------------------------------------------------------------------------------------------------------------------------------------------------------------------------------|----------------------------------------------------------------------------------------------------------------------------------------------------------------------------------------------------------------------------------------------------------------------------------------|---------------------------------------------------------------------------------------------------------------------------------------------------------------------------------------------------------------------------------------------------------------------------------------------------------------------------------------------------------------------------------------------------------------------------------------------------------------------------------------------------------------------------------------------------------------------------------------------------------------------------------------------------------------------------------------------------------------------------------------------------------------------------------------------------------|
| <b>JAK/STAT3 inhibition</b><br><i>AG490</i><br><i>PpYLKTK</i>                                                                                                                                                                                                                                                                                                                                                                                                                                                                                                                                                                 | AG490 inhibits the phosphorylation of STAT3 by JAK2 thereby no binding of STAT3 responsive element and reduced hepcidin expression<br>PpYLKTK is a peptide agent that disrupts pSTAT3 dimerization required for binding of hepcidin promoting target genes                             | Proinflammatory cytokines released due to a variety of stimulants e.g. malignancy. IL-6 binds IL-6 receptor on hepatocyte activating the JAK1/2 cascade causing phosphorylation of STAT3 transcription factor (STAT3-TF) that then translocates to the nucleus<br>In the nucleus STAT3-TF binds STAT3 responsive element (STAT-RE) on hepcidin promoter region<br>STAT3-RE must be coupled with BMP-RE (which is activated via the BMP/HJV/SMAD pathway) for IL-6 mediated hepcidin expression to occur<br>Once coupled hepcidin translation occurs with hepcidin release and degradation of ferroportin<br>Erythroferrone suppresses hepcidin to promote the mobilization of stored iron and the absorption of dietary iron, so that the increased iron demands of developing erythrocytes can be met. |
| <b>AMPK activator</b><br><i>Metformin, DS79182026</i>                                                                                                                                                                                                                                                                                                                                                                                                                                                                                                                                                                         | AMP-activated protein kinase (AMPK) promotes JAK2 degradation reducing STAT3 phosphorylation and hepcidin expression                                                                                                                                                                   |                                                                                                                                                                                                                                                                                                                                                                                                                                                                                                                                                                                                                                                                                                                                                                                                         |
| <b>IL-6 inhibitors</b><br><i>Tocilizumab, Siltuximab</i>                                                                                                                                                                                                                                                                                                                                                                                                                                                                                                                                                                      | Inhibit the IL-6/STAT3 pathway via antibodies to the IL-6 receptor (tocilizumab) or via antibodies to the IL-6 ligand<br>- Limited by increased infective risks                                                                                                                        |                                                                                                                                                                                                                                                                                                                                                                                                                                                                                                                                                                                                                                                                                                                                                                                                         |
| <b>IL1-β inhibitors</b><br><i>Canakinumab</i>                                                                                                                                                                                                                                                                                                                                                                                                                                                                                                                                                                                 | Monoclonal antibody against IL1-β involved in the inflammatory pathway                                                                                                                                                                                                                 |                                                                                                                                                                                                                                                                                                                                                                                                                                                                                                                                                                                                                                                                                                                                                                                                         |
| <b>Erythroferrone</b>                                                                                                                                                                                                                                                                                                                                                                                                                                                                                                                                                                                                         | Erythroferrone (ERFE) is responsible for early hepcidin suppression during erythropoietic activity stimulated by endogenous or exogenous EPO.                                                                                                                                          |                                                                                                                                                                                                                                                                                                                                                                                                                                                                                                                                                                                                                                                                                                                                                                                                         |
| <b>Agents upregulating erythropoiesis (negative regulator of hepcidin)</b>                                                                                                                                                                                                                                                                                                                                                                                                                                                                                                                                                    |                                                                                                                                                                                                                                                                                        |                                                                                                                                                                                                                                                                                                                                                                                                                                                                                                                                                                                                                                                                                                                                                                                                         |
| <b>HIF-prolyl hydroxylase inhibitors (EGLN inhibitors)</b><br><i>Roxadustat, Vadadustat, Daprodustat, Enarodustat, FG-4692, AKB-6548, GSK1278863, JTZ-951, BAY85-3934</i>                                                                                                                                                                                                                                                                                                                                                                                                                                                     | Prolyl hydroxylase domain-2 (PDH2) inhibitors stabilize HIF-1 and HIF-2 → stable HIF stimulates endogenous erythropoietin production which suppresses hepcidin leading to greater iron availability for erythropoiesis<br>- Activates HIF in presence of oxygen (normoemic conditions) | Hypoxia stimulates the production of EPO via signalling by hypoxia inducible factor (HIF) which also suppresses hepcidin production. Under normoemic conditions, prolyl hydroxylases constitutively degrade HIF, allowing hepcidin production to occur.                                                                                                                                                                                                                                                                                                                                                                                                                                                                                                                                                 |
| <b>Agents interacting with Ferroportin</b>                                                                                                                                                                                                                                                                                                                                                                                                                                                                                                                                                                                    |                                                                                                                                                                                                                                                                                        |                                                                                                                                                                                                                                                                                                                                                                                                                                                                                                                                                                                                                                                                                                                                                                                                         |
| <b>Ferroportin agonists/stabilisers</b><br><i>LY2928057</i><br><i>Fursultiamine</i>                                                                                                                                                                                                                                                                                                                                                                                                                                                                                                                                           | Humanized antibody to ferroportin that block the hepcidin-ferroportin interaction while maintaining ferroportin function thereby maintain iron influx.<br>- Fursultiamine prevents hepcidin-FPN interactions by competing with hepcidin to bind FPN on the hepcidin binding site       | FPN is a transmembrane protein that is expressed by duodenal enterocytes, splenic macrophages, and hepatocytes<br>↑ hepcidin causes degradation of ferroportin leading to inability to mobilise store iron                                                                                                                                                                                                                                                                                                                                                                                                                                                                                                                                                                                              |
| Note. Mechanism and relevant physiology description are adapted from The Hepcidin-Ferroportin System as a Therapeutic Target in Anemias and Iron Overload Disorders, by Ganz et al <i>Hematology</i> 2011(32), "Hepcidin Therapeutics" by Katsarou et al, <i>Pharmaceuticals</i> 2018(33), pharmacological targeting of the hepcidin/ferroportin axis by Sebastiani et al, <i>Frontiers in pharmacology</i> 2016(36), and "Targeting the hepcidin-ferroportin axis to develop new treatment strategies for anemia of chronic disease and anemia of inflammation" by Sun et al. <i>American Journal of Hematology</i> 2012(37) |                                                                                                                                                                                                                                                                                        |                                                                                                                                                                                                                                                                                                                                                                                                                                                                                                                                                                                                                                                                                                                                                                                                         |



1  
2  
3 Publication type, study design, language, and timeframe  
4  
5

6 We will include prospective and retrospective observational studies and randomised and  
7  
8 pseudo-randomised controlled trials. Controlled trials can be of any design including parallel,  
9  
10 cross over and cluster randomised trials. Open-label clinical trials will be eligible for inclusion.  
11  
12 Preclinical safety and dose finding studies in humans will be included. Commentaries, letters,  
13  
14 and conference abstracts will be included. Case reports, case studies and animal studies will be  
15  
16 excluded. No limitation will be placed on the setting or time frame of follow up or on language  
17  
18 or country of study. We will only include studies published since January 1, 2010 to focus our  
19  
20 search on contemporary evidence specific to our research aims; namely, the stage of  
21  
22 development of novel drugs.  
23  
24  
25  
26  
27  
28

### 29 **Information sources**

30  
31 The search will be run in Scopus, MEDLINE (Ovid) and Excerpta Medica database (Ovid) to  
32  
33 account for variability in the indexing in each database. We will supplement the electronic  
34  
35 database search by searching for ongoing or recently completed trial protocols in international  
36  
37 trial registries including clinicaltrials.gov, the Australian New Zealand Clinical Trials Registry  
38  
39 (ANZCTR), the European Union Clinical Trial register and the International Clinical Trials  
40  
41 Registry Platform (ICTRP). Each article included in the review will have its reference list  
42  
43 scanned to ensure literature saturation.  
44  
45  
46  
47  
48  
49

### 50 **Search strategy**

51  
52 We conducted an initial abbreviated search to refine and define our search terms and to avoid  
53  
54 duplication of any existing reviews. This was subsequently used to develop a search strategy  
55  
56 using medical subject headings (MeSH) with Boolean operations.  
57  
58  
59  
60

1  
2  
3 The search strategy was developed with the help of the information specialists from the  
4 University of Western Australia, was piloted against a random search of 50 abstracts, and  
5 refined subsequently. Search results will be limited to abstracts published after 2010 with no  
6 language or jurisdiction limitations. The international clinical trial registry platform search  
7 portal and clinical trial.gov will be search for ongoing or recently completed trials. PROSPERO  
8 will be reviewed for any ongoing or recent reviews. The search includes general terms to  
9 describe anaemia and potential pathways to management, as well as more specific terms (i.e.,  
10 prolyl hydroxylase inhibitors). The full version of the search strategy can be found in  
11 Supplemental File 1.  
12  
13  
14  
15  
16  
17  
18  
19  
20  
21  
22  
23  
24  
25

## 26 **Study records**

### 27 28 29 Data management

30  
31  
32 The scoping review will be reported using the framework as described by Arksey and O'Malley  
33 (50) and the PRISMA-ScR checklist.(46) The literature search results will be imported into a  
34 review management program (Covidence, Melbourne, Australia) to facilitate the study  
35 selection process. Abstracts and citations will be uploaded and screened against inclusion  
36 criteria. A data extraction form was developed and piloted by the review team based on the  
37 study inclusion and exclusion criteria (Supplemental File 2).  
38  
39  
40  
41  
42  
43  
44  
45  
46  
47  
48

### 49 Selection process

50  
51 Two independent review authors (AD and PD) will screen all titles and abstracts yielded by  
52 the search against the inclusion criteria. For any abstract where consensus is not achieved a  
53 third reviewer (CD or LFM) will adjudicate its suitability for inclusion. For any article that  
54  
55  
56  
57  
58  
59  
60

1  
2  
3 meets the inclusion criteria, a full text extraction will be obtained. For any full text articles that  
4  
5 do not meet the inclusion criteria the reason for exclusion will be documented.  
6  
7  
8  
9

#### 10 Data collection process

11  
12  
13 Data will be independently extracted by two authors (AD and PD) using a predeveloped and  
14  
15 piloted data extraction form (Supplemental File 2). Again, for any extraction where there is no  
16  
17 consensus between the two authors, a third author (CD or LFM) will adjudicate. To ensure  
18  
19 consistency between reviewers a calibration exercise has been performed prior to commencing  
20  
21 the formal data collection process. In keeping with established scoping review methodology  
22  
23 ongoing consultation with the senior members of the scoping team (TR and LFM) will occur  
24  
25 to guide additional data extraction from the papers as deemed necessary. Where data requires  
26  
27 further confirmation, all attempts will be made to seek clarification from the corresponding  
28  
29 author of the study and where it is unable to be confirmed will be documented in the results.  
30  
31  
32  
33  
34  
35  
36

#### 37 Data items

38  
39 Data will be sought for the following variables:

- 40  
41 1. Participant information including n value, treatment setting and descriptive data of  
42  
43 participants (age, gender, diagnostic criteria, treatment history, documented  
44  
45 comorbidities);  
46  
47
- 48 2. Study methodology including study design, country, setting and design limitations;  
49
- 50 3. Study intervention and comparator including duration of treatment, timepoints for  
51  
52 follow-up, route of intervention (oral or intravenous), frequency of intervention;  
53  
54
- 55 4. Primary and secondary outcomes as defined above.  
56  
57  
58  
59  
60

## Outcomes and prioritisations

We have chosen to identify and define our outcome measures *a priori*, however, given the scoping nature of this review, revision of these outcomes and expansion or refinement as necessary will occur through the full text review and data extraction process.

The primary outcome of this review will be to investigate which agents facilitate an increase in haemoglobin concentration from baseline as defined by the individual study criteria. Change in haemoglobin concentration is used frequently as an indication of treatment efficacy in clinical trials that aim to treat anaemia. It is therefore expected to be an endpoint in any study investigating novel agents for use in anaemia. Change in haemoglobin concentration is not without limitations, most importantly the potential lack of consistent associations with meaningful clinical changes such as complication rates, particularly in a peri-operative patient cohort. Therefore, this measure will be considered in addition to secondary outcomes to determine the suitability of a potential novel agent for use in a peri-operative patient cohort. The time taken to demonstrate a change in haemoglobin concentration will be of importance, given that these patients often require an intervention that offers benefit within a limited time period prior to surgery.<sup>(51)</sup> Therefore, any timepoint for which haemoglobin concentration is recorded following a baseline measurement will be reviewed. Similarly the optimal time to intervene in patients with pre-operative anaemia is not yet known, further highlighting the need to characterise the timeline of changes in haemoglobin concentration.

Where available, data pertaining to iron parameters (ferritin, transferrin saturation, soluble transferrin receptor) will be recorded and reviewed to further inform the potential patient cohorts in which the novel agents may be best suited. Patients will be considered as being iron deficient or having inadequate iron stores if they define a cut off of ferritin < 100 µmol/L or

1  
2  
3 transferrin saturation < 20%.<sup>(52)</sup> As previously discussed, the cause of anaemia can be  
4 multifactorial and so understanding the interplay of a potential therapeutic agent with the  
5 concomitant cause of anaemia will be important in developing participant selection criteria for  
6 future prospective interventional studies.  
7  
8  
9  
10  
11  
12  
13

14 In peri-operative research there is an imperative to ensure that research include clinically  
15 relevant patient centred outcome measures (49) to ensure that therapies have a significant effect  
16 on the functional and physical capacity of the patient in addition to procedural complications.  
17 Therefore, we will also determine to what extent patient centred outcomes have been  
18 investigated thus far. It is unknown if there will be any data on survival measures or healthcare  
19 resource utilisation. This review will address this by collecting data on patient mortality,  
20 morbidity, length of hospital and/or ICU stay and health care costs of treatment.  
21  
22  
23  
24  
25  
26  
27  
28  
29  
30  
31  
32

33 Safety of tested interventions will be assessed through documented major and minor adverse  
34 effects. Any immediate post-administration complications or side-effects will be reviewed.  
35 Charting of this data (particularly those data describing different interventions or combinations  
36 of interventions) will inform future clinical trial design.  
37  
38  
39  
40  
41  
42  
43  
44

### 45 **Risk of bias**

46 Given the scoping nature of this review a formal bias assessment will not be performed.  
47  
48  
49  
50  
51

### 52 **Data synthesis**

53 The review will be reported in accordance with the PRISMA-ScR guidelines.<sup>(46)</sup>  
54 Demographic and methodological data will be charted in a tabulated form. Study interventions  
55 and outcome data will be charted as a combination of narrative discussion and an alluvial  
56  
57  
58  
59  
60

1  
2  
3 diagram. An alluvial diagram is a type of flow diagram designed to represent dynamic  
4 relationships in a system. We intend to use this to cluster the different variables from our data  
5 set to show the relationship and volume of evidence in a particular area; Simple frequency  
6 analysis will inform the size of the components between each stream. A stream will be a novel  
7 drug or drugs with similar mechanism. Streams will then be ‘blocked’ according to the  
8 following: agent; patient population; study type; comparator; added treatment; outcomes. In  
9 keeping with scoping review methodology, a meta-analysis will not be performed.  
10  
11  
12  
13  
14  
15  
16  
17  
18  
19  
20

### 21 **Meta-bias**

22  
23 This scoping review has been undertaken to inform if there is a need for a more formal review  
24 with meta-analysis; accordingly, a meta-bias analysis is beyond the scope of this review.  
25  
26  
27  
28  
29  
30

### 31 **Confidence in cumulative evidence**

32  
33 A thorough assessment of the risk of bias and other factors that can be used to describe the  
34 quality of evidence falls beyond the capacity of this review and lies outside the proposed  
35 scoping methodology. Such an assessment will not be included.  
36  
37  
38  
39  
40  
41

### 42 **Patient and public involvement**

43  
44 No patient or public involvement.  
45  
46  
47  
48  
49  
50  
51  
52  
53  
54  
55  
56  
57  
58  
59  
60

### **ETHICS AND DISSEMINATION**

This scoping review will be reported following the PRISMA-ScR criteria. Ethics approval is not required as the study will only review previously published literature. The findings of this scoping review will be published in a peer-reviewed scientific journal. The results of this study will inform the methodology of future prospective studies utilising novel agents for the management of anaemia in the perioperative setting.

For peer review only

## Contributors

LFM is the guarantor. AD, PD and LFM drafted the manuscript. TR was involved with critical revision of the abstract for important intellectual content. All authors contributed to the development of the selection criteria, the data extraction criteria, and the charting methodology. AD and CD developed the search strategy. All authors read, provided feedback, and approved the final manuscript. The authors acknowledge the assistance of the information specialists of the University of Western Australia University Library in devising the search strategy.

## Funding

This research received no specific grant from any funding agency in the public, commercial or not-for-profit sectors.

## Competing interests

All authors have completed the ICMJE uniform disclosure form at <http://www.icmje.org/disclosure-of-interest/> and declare: the Division of Surgery of the University of Western Australia is the Sponsor, with overall control of the data. TR reports grants from the National Institute for Health Research (UK), National Health and Medical Research Council (Australia), grants, personal fees and non-financial support from Pharmocosmos Therapeutics Inc., grants, personal fees and non-financial support from Vifor Pharma Pty Ltd, grants from the Medical Research Future Fund (Australia), grants from the Future Health Research and Innovation Fund (Western Australia), grants and personal fees from Pfizer Pty Ltd (Australia), and personal fees from BioAge Labs Inc., outside the submitted work; TR is a regular speaker at national and international conferences on anaemia, blood transfusion, wound healing and vascular disease for which he has received expenses for travel, accommodation and sundries, TR has worked with several agencies promoting meetings or



1  
2  
3 healthcare. TR is a director of The Iron Clinic Ltd, director of Veincare London Ltd and Vein  
4 Care WA. TR is the Vascular lead for 18-week wait Ltd. LFM reports grants from Vifor Pharma  
5  
6 Pty Ltd, the Australian and New Zealand College of Anaesthetists, the Victorian Department  
7  
8 of Health, the Epworth Medical foundation, and the Austin Medical Research foundation,  
9  
10 outside the submitted work. LFM has a leadership or fiduciary role with the National Medical  
11  
12 Advisory Committee, Red Cross Lifeblood, Australia and Blood Matters Advisory Committee,  
13  
14 Department of Health, Victorian State Government. PD, AD and CD declare no financial  
15  
16 relationships with any organisations that might have an interest in the submitted work in the  
17  
18 previous three years and no other relationships or activities that could appear to have influenced  
19  
20 the submitted work.  
21  
22  
23  
24  
25  
26  
27  
28  
29  
30  
31  
32  
33  
34  
35  
36  
37  
38  
39  
40  
41  
42  
43  
44  
45  
46  
47  
48  
49  
50  
51  
52  
53  
54  
55  
56  
57  
58  
59  
60

**REFERENCES**

1. Kassebaum NJ, Collaborators GBDA. The Global Burden of Anemia. *Hematol Oncol Clin North Am.* 2016;30(2):247-308.
2. Caro JJ, Salas M, Ward A, et al. Anemia as an independent prognostic factor for survival in patients with cancer: a systemic, quantitative review. *Cancer.* 2001;91(12):2214-21.
3. Cella D. Quality of life and clinical decisions in chemotherapy-induced anemia. *Oncology (Williston Park).* 2006;20(8 Suppl 6):25-8.
4. Koutroubakis IE, Ramos-Rivers C, Regueiro M, et al. Five-Year Period Prevalence and Characteristics of Anemia in a Large US Inflammatory Bowel Disease Cohort. *J Clin Gastroenterol.* 2016;50(8):638-43.
5. Musallam KM, Tamim HM, Richards T, et al. Preoperative anaemia and postoperative outcomes in non-cardiac surgery: a retrospective cohort study. *Lancet.* 2011;378(9800):1396-407.
6. Shander A, Javidroozi M, Lobel G. Patient blood management in the intensive care unit. *Transfusion medicine reviews.* 2017;31(4):264-71.
7. Shorr AF, Doyle J, Stern L, et al. Anemia in chronic obstructive pulmonary disease: epidemiology and economic implications. *Current Medical Research and Opinion.* 2008;24(4):1123-30.
8. Baron DM, Hochrieser H, Posch M, et al. Preoperative anaemia is associated with poor clinical outcome in non-cardiac surgery patients. *Br J Anaesth.* 2014;113(3):416-23.
9. Spinowitz B, Pecoits-Filho R, Winkelmayr WC, et al. Economic and quality of life burden of anemia on patients with CKD on dialysis: a systematic review. *Journal of Medical Economics.* 2019;22(6):593-604.

10. Partridge J, Harari D, Gossage J, et al. Anaemia in the older surgical patient: a review of prevalence, causes, implications and management. *J R Soc Med*. 2013;106(7):269-77.
11. Muñoz M, Gómez-Ramírez S, Campos A, et al. Pre-operative anaemia: prevalence, consequences and approaches to management. *Blood Transfus*. 2015;13(3):370-9.
12. Glance LG, Dick AW, Mukamel DB, et al. Association between Intraoperative Blood Transfusion and Mortality and Morbidity in Patients Undergoing Noncardiac Surgery. *Anesthesiology*. 2011;114(2):283-92.
13. Warner MA, Shore-Lesserson L, Shander A, et al. Perioperative anemia: prevention, diagnosis, and management throughout the spectrum of perioperative care. *Anesthesia & Analgesia*. 2020;130(5):1364-80.
14. Nemeth E, Ganz T. Anemia of inflammation. *Hematol Oncol Clin North Am*. 2014;28(4):671-81, vi.
15. Weiss G, Goodnough L. Anemia of Chronic Disease. *N Engl J Med*. 2005;352(10):1011-23.
16. Hanna RM, Streja E, Kalantar-Zadeh K. Burden of Anemia in Chronic Kidney Disease: Beyond Erythropoietin. *Adv Ther*. 2021;38(1):52-75.
17. McSorley ST, Anderson JH, Whittle T, et al. The impact of preoperative systemic inflammation on the efficacy of intravenous iron infusion to correct anaemia prior to surgery for colorectal cancer. *Perioper Med (Lond)*. 2020;9:17-.
18. Adamson JW. The Anemia of Inflammation/Malignancy: Mechanisms and Management. *Hematology*. 2008;2008(1):159-65.
19. Borstlap WAA, Stellingwerf ME, Moolla Z, et al. Iron therapy for the treatment of preoperative anaemia in patients with colorectal carcinoma: a systematic review. *Colorectal Disease*. 2015;17(12):1044-54.

- 1  
2  
3 20. Evans CR, Jones R, Phillips G, et al. Observational study of pre-operative intravenous  
4 iron given to anaemic patients before elective cardiac surgery. *Anaesthesia*. 2021;76(5):639-  
5 46.  
6  
7  
8  
9  
10 21. Moon T, Smith A, Pak T, et al. Preoperative Anemia Treatment with Intravenous Iron  
11 Therapy in Patients Undergoing Abdominal Surgery: A Systematic Review. *Adv Ther*.  
12 2021;38(3):1447-69.  
13  
14  
15  
16  
17 22. Quarterman C, Shaw M, Hughes S, et al. Anaemia in cardiac surgery – a retrospective  
18 review of a centre's experience with a pre-operative intravenous iron clinic. *Anaesthesia*.  
19 2021;76(5):629-38.  
20  
21  
22  
23  
24 23. Shah A, Palmer AJR, Fisher SA, et al. What is the effect of perioperative intravenous  
25 iron therapy in patients undergoing non-elective surgery? A systematic review with meta-  
26 analysis and trial sequential analysis. *Perioper Med (Lond)*. 2018;7:30-  
27  
28  
29  
30  
31 24. So-Osman C, Nelissen RG, Koopman-van Gemert AW, et al. Patient blood  
32 management in elective total hip- and knee-replacement surgery (Part 1): a randomized  
33 controlled trial on erythropoietin and blood salvage as transfusion alternatives using a  
34 restrictive transfusion policy in erythropoietin-eligible patients. *Anesthesiology*.  
35 2014;120(4):839-51.  
36  
37  
38  
39  
40  
41  
42 25. Ng O, Keeler BD, Mishra A, et al. Iron therapy for preoperative anaemia. *Cochrane*  
43 *Database of Systematic Reviews*. 2019(12).  
44  
45  
46  
47 26. Okuyama M, Ikeda K, Shibata T, et al. Preoperative Iron Supplementation and  
48 Intraoperative Transfusion During Colorectal Cancer Surgery. *Surgery Today*.  
49 2005;35(1):36-40.  
50  
51  
52  
53  
54 27. Cuenca J, García-Erce JA, Martínez AA, et al. Role of parenteral iron in the  
55 management of anaemia in the elderly patient undergoing displaced subcapital hip fracture  
56 repair: preliminary data. *Archives of Orthopaedic and Trauma Surgery*. 2005;125(5):342-7.  
57  
58  
59  
60

- 1  
2  
3 28. Muñoz M, Gómez-Ramírez S, Cuenca J, et al. Very-short-term perioperative  
4 intravenous iron administration and postoperative outcome in major orthopedic surgery: a  
5 pooled analysis of observational data from 2547 patients. *Transfusion*. 2014;54(2):289-99.  
6  
7  
8  
9  
10 29. Litton E, Xiao J, Ho KM. Safety and efficacy of intravenous iron therapy in reducing  
11 requirement for allogeneic blood transfusion: systematic review and meta-analysis of  
12 randomised clinical trials. *BMJ : British Medical Journal*. 2013;347:f4822.  
13  
14  
15  
16  
17 30. Richards T, Baikady RR, Clevenger B, et al. Preoperative intravenous iron to treat  
18 anaemia before major abdominal surgery (PREVENTT): a randomised, double-blind,  
19 controlled trial. *The Lancet*. 2020;396(10259):1353-61.  
20  
21  
22  
23  
24 31. Kei T, Mistry N, Curley G, et al. Efficacy and safety of erythropoietin and iron  
25 therapy to reduce red blood cell transfusion in surgical patients: a systematic review and  
26 meta-analysis. *Canadian Journal of Anesthesia/Journal canadien d'anesthésie*.  
27  
28  
29  
30 2019;66(6):716-31.  
31  
32  
33 32. Ganz T, Nemeth E. The Hepcidin-Ferroportin System as a Therapeutic Target in  
34 Anemias and Iron Overload Disorders. *Hematology*. 2011;2011(1):538-42.  
35  
36  
37 33. Katsarou A, Pantopoulos K. Hepcidin Therapeutics. *Pharmaceuticals*. 2018;11(4):127.  
38  
39  
40 34. Langer AL, Ginzburg YZ. Role of hepcidin-ferroportin axis in the pathophysiology,  
41 diagnosis, and treatment of anemia of chronic inflammation. *Hemodialysis International*.  
42  
43  
44 2017;21:S37-S46.  
45  
46  
47 35. Sagar P, Angmo S, Sandhir R, et al. Effect of hepcidin antagonists on anemia during  
48 inflammatory disorders. *Pharmacology & Therapeutics*. 2021;226:107877.  
49  
50  
51 36. Sebastiani G, Wilkinson N, Pantopoulos K. Pharmacological targeting of the  
52 hepcidin/ferroportin axis. *Frontiers in pharmacology*. 2016;7:160.  
53  
54  
55  
56  
57  
58  
59  
60

- 1  
2  
3 37. Sun CC, Vaja V, Babitt JL, et al. Targeting the hepcidin-ferroportin axis to develop  
4 new treatment strategies for anemia of chronic disease and anemia of inflammation. *Am J*  
5  
6 *Hematol.* 2012;87(4):392-400.  
7  
8  
9  
10 38. Wen T, Zhang X, Wang Z, et al. Hypoxia-Inducible Factor Prolyl Hydroxylase  
11  
12 Inhibitors in Patients with Renal Anemia: A Meta-Analysis of Randomized Trials. *Nephron.*  
13  
14 2020;144(11):572-82.  
15  
16  
17 39. Zhang S, Guo J, Xie S, et al. Efficacy and safety of hypoxia-inducible factor prolyl  
18  
19 hydroxylase inhibitor (HIF-PHI) on anemia in non-dialysis-dependent chronic kidney disease  
20  
21 (NDD-CKD): a systematic review and meta-analysis. *International Urology and Nephrology.*  
22  
23 2021;53(6):1139-47.  
24  
25  
26 40. Jia L, Dong X, Yang J, et al. Effectiveness of hypoxia-inducible factor prolyl  
27  
28 hydroxylase inhibitor roxadustat on renal anemia in non-dialysis-dependent chronic kidney  
29  
30 disease: a systematic review and meta-analysis. *Ann Transl Med.* 2019;7(23):720-  
31  
32  
33 41. Wang B, Yin Q, Han Y-C, et al. Effect of hypoxia-inducible factor-prolyl hydroxylase  
34  
35 inhibitors on anemia in patients with CKD: a meta-analysis of randomized controlled trials  
36  
37 including 2804 patients. *Renal Failure.* 2020;42(1):912-25.  
38  
39  
40 42. Chen H, Cheng Q, Wang J, et al. Long-term efficacy and safety of hypoxia-inducible  
41  
42 factor prolyl hydroxylase inhibitors in anaemia of chronic kidney disease: A meta-analysis  
43  
44 including 13,146 patients. *Journal of Clinical Pharmacy and Therapeutics.* 2021;46(4):999-  
45  
46 1009.  
47  
48  
49 43. Chertow GM, Pergola PE, Farag YM, et al. Vadadustat in patients with anemia and  
50  
51 non-dialysis-dependent CKD. *New England Journal of Medicine.* 2021;384(17):1589-600.  
52  
53  
54 44. Singh AK, Carroll K, Perkovic V, et al. Daprodustat for the treatment of anemia in  
55  
56 patients undergoing dialysis. *New England Journal of Medicine.* 2021;385(25):2325-35.  
57  
58  
59  
60

- 1  
2  
3 45. Moher D, Shamseer L, Clarke M, et al. Preferred reporting items for systematic  
4 review and meta-analysis protocols (PRISMA-P) 2015 statement. *Systematic reviews*.  
5  
6 2015;4(1):1-9.  
7  
8  
9  
10 46. Tricco AC, Lillie E, Zarin W, et al. PRISMA extension for scoping reviews  
11  
12 (PRISMA-ScR): checklist and explanation. *Annals of internal medicine*. 2018;169(7):467-73.  
13  
14 47. Butcher A, Richards T, Stanworth SJ, et al. Diagnostic criteria for pre-operative  
15  
16 anaemia—time to end sex discrimination. *Anaesthesia*. 2017;72(7):811-4.  
17  
18 48. Miles LF, Larsen T, Bailey MJ, et al. Borderline anaemia and postoperative outcome  
19  
20 in women undergoing major abdominal surgery: a retrospective cohort study. *Anaesthesia*.  
21  
22 2020;75(2):210-7.  
23  
24 49. Myles PS, Grocott MPW, Boney O, et al. Standardizing end points in perioperative  
25  
26 trials: towards a core and extended outcome set. *BJA: British Journal of Anaesthesia*.  
27  
28 2016;116(5):586-9.  
29  
30  
31 50. Arksey H, O'Malley L. Scoping studies: towards a methodological framework.  
32  
33 *International journal of social research methodology*. 2005;8(1):19-32.  
34  
35 51. Whittaker TM, Abdelrazek ME, Fitzpatrick AJ, et al. Delay to elective colorectal  
36  
37 cancer surgery and implications for survival: a systematic review and meta-analysis.  
38  
39 *Colorectal Disease*. 2021.  
40  
41 52. Muñoz M, Acheson AG, Bisbe E, et al. An international consensus statement on the  
42  
43 management of postoperative anaemia after major surgical procedures. *Anaesthesia*.  
44  
45 2018;73(11):1418-31.  
46  
47  
48  
49  
50  
51  
52  
53  
54  
55  
56  
57  
58  
59  
60

## Search Strategy

### Medline:

- 1 iron defic\*.ti.
- 2 an\*emia not (leuk\*emia or h\*emolytic or sickle or malaria or myelodysplas\* or sideroblast\* or thalassemia\*).ti.
- 3 h\*emoglobin.tw.
- 4 treatment\* or therap\* or drug\* or pharm\*.tw.
- 5 1 or 2
- 6 5 and 3 and 4
- 7 STAT3 inhibi\* or AG490 or ppYLKTK.tw.
- 8 AMPK activ\* or metformin or DS79182026.tw.
- 9 IL-6 inhibi\* or interleukin-6 inhibi\* or toclizumab or siltuximab.tw.
- 10 IL-1 inhibi\* or interleukin 1 inhibi\* or canakinumab.tw. 1372
- 11 erythroferron\*.tw.
- 12 Prolyl-Hydroxylase Inhibitors/ or hypoxia inducible factor prolyl hydroxylase inhibitors.mp. or Hypoxia-Inducible Factor-Proline Dioxygenases/
- 13 hypoxia inducible factor stabili\*er\*.tw.
- 14 roxadustat.tw.
- 15 daprodustat.tw.
- 16 vadadustat.tw.
- 17 molidustat.tw.
- 18 enarodustat.tw.
- 19 desidustat.tw.
- 20 FG-4592.tw.
- 21 ASP1517.tw.
- 22 AZD9941.tw.
- 23 BAY85-3934.tw.
- 24 GSK1278863.tw.
- 25 AKB-6548.tw.
- 26 JTZ-951.tw.
- 27 ZYAN-1.tw.
- 28 ferroportin stabili\*er\* or ferroportin agonist\* or LY298057 or fursultiamine.tw.
- 29 anticalin\* or hepcidin binding protein\* or PRS-080.tw.
- 30 antihepcidin antibod\* or A12B9m or Ly2787106.tw.
- 31 hepcidin spiegelmer\* or hepcidin binding L-RNA aptamer\* or lexapetid pegol NOX-H94.tw. 2
- 32 (short interfering RNA or shRNA or siRNA or short hairpin RNA or H6 or H10 or ALN-HPN) and hepcidin.mp.
- 33 activin like kinase receptor inhibi\* or ALK2 inhibi\* or ALK3 inhibi\* or OD66 or TP-0184 or INCB00928 or momelotinib or indazole or DS79182026.tw.
- 34 bone morphogenic protein type 1 receptor inhibi\* or BMP type 1 receptor inhibi\* or dorsomorphin or LDN-193189 or LDN-212854.tw.
- 35 BMP6 inhibi\* or bone morphogenic protein 6 inhibi\* or imatinib or spironolactone.tw.
- 36 hemojuvelin inibit\* or hemojuvelin antibod\* or sHJV or h5F923 or h5F9-AM or ABT-207.tw.
- 37 transferrin receptor RNAi.tw.
- 38 7 or 8 or 9 or 10 or 11 or 12 or 13 or 14 or 15 or 16 or 17 or 18 or 19 or 20 or 21 or 22 or 23 or 24 or 25 or 26 or 27 or 28 or 29 or 30 or 31 or 32 or 33 or 34 or 35 or 36 or 37
- 39 5 and 38



- 1  
2  
3 40 6 or 39  
4 41 limit 40 to (humans and yr="2010 -Current")  
5  
6  
7

8 **Embase Classic + Embase:**

- 9 1 iron defic\*.ti.  
10 2 an\*emia not (leuk\*emia or h\*emolytic or sickle or malaria or myelodysplas\* or  
11 sideroblast\* or thalassemia\*).ti.  
12 3 h\*emoglobin.tw.  
13 4 treatment\* or therap\* or drug\* or pharm\*.tw.  
14 5 1 or 2  
15 6 5 and 3 and 4  
16 7 STAT3 inhibi\* or AG490 or ppYLKTK.tw.  
17 8 AMPK activ\* or metformin or DS79182026.tw.  
18 9 IL-6 inhibi\* or interleukin-6 inhibi\* or tocilizumab or siltuximab.tw.  
19 10 IL-1 inhibit\* or interleukin 1 inhibit\* or canakinumab.tw. 1372  
20 11 erythroferron\*.tw.  
21 12 Prolyl-Hydroxylase Inhibitors/ or hypoxia inducible factor prolyl hydroxylase  
22 inhibitors.mp. or Hypoxia-Inducible Factor-Proline Dioxygenases/  
23 hypoxia inducible factor stabili\*er\*.tw.  
24 13 roxadustat.tw.  
25 14 daprodustat.tw.  
26 15 vadadustat.tw.  
27 16 molidustat.tw.  
28 17 enarodustat.tw.  
29 18 desidustat.tw.  
30 19 FG-4592.tw.  
31 20 ASP1517.tw.  
32 21 AZD9941.tw.  
33 22 BAY85-3934.tw.  
34 23 GSK1278863.tw.  
35 24 AKB-6548.tw.  
36 25 JTZ-951.tw.  
37 26 ZYAN-1.tw.  
38 27 ferroportin stabili\*er\* or ferroportin agonist\* or LY298057 or fursultiamine.tw.  
39 28 anticalin\* or hepcidin binding protein\* or PRS-080.tw.  
40 29 antihepcidin antibod\* or A12B9m or Ly2787106.tw.  
41 30 hepcidin spiegelmer\* or hepcidin binding L-RNA aptamer\* or lexapetid pegol NOX-  
42 H94.tw. 2  
43 31 (short interfering RNA or shRNA or siRNA or short hairpin RNA or H6 or H10 or  
44 ALN-HPN) and hepcidin.mp.  
45 32 activin like kinase receptor inhibit\* or ALK2 inhibit\* or ALK3 inhibit\* or OD66 or  
46 TP-0184 or INCB00928 or momelotinib or indazole or DS79182026.tw.  
47 33 bone morphogenic protein type 1 receptor inhibit\* or BMP type 1 receptor inhibit\* or  
48 dorsomorphin or LDN-193189 or LDN-212854.tw.  
49 34 BMP6 inhibit\* or bone morphogenic protein 6 inhibit\* or imatinib or  
50 spironolactone.tw.  
51 35 hemojuvelin inibit\* or hemojuvelin antibod\* or sHJV or h5F923 or h5F9-AM or  
52 ABT-207.tw.  
53 36 transferrin receptor RNAi.tw.  
54  
55  
56  
57  
58  
59  
60

- 1  
2  
3 38 7 or 8 or 9 or 10 or 11 or 12 or 13 or 14 or 15 or 16 or 17 or 18 or 19 or 20 or 21 or 22  
4 or 23 or 24 or 25 or 26 or 27 or 28 or 29 or 30 or 31 or 32 or 33 or 34 or 35 or 36 or 37  
5  
6 39 5 and 38  
7 40 6 or 39  
8 41 limit 40 to (humans and yr="2010 -Current")  
9  
10

## 11 Scopus

- 12 1. TITLE-ABS-KEY  
13 (treatment OR therap\* OR pharm\* OR safe\* OR efficacy OR drug\*) AND  
14 2. TITLE (an\*emia) OR TITLE ( "iron defic\*" ) AND  
15 3. TITLE-ABS-KEY ( h\*emoglobin ) OR  
16 4. TITLE-ABS-KEY ( "stat3 inhibi\*" OR "ag490" OR "ppylktk" "ampk  
17 activ\*" OR "metformin" OR "ds78182026" OR "il-6 inhibi\*" OR "interleukin-6  
18 inhibi\*" OR "tocilizumab" OR "siltuximab" OR "il-1 inhibi\*" OR "interleukin 1  
19 inhibi\*" OR "canakinumab" OR "erythroferron\*" OR "prolyl hydroxylase  
20 inhibi\*" OR "hypoxia inducible factor prolyl hydroxylase inhibi\*" OR "hypoxia  
21 inducible factor proline dioxygenase\*" OR "hif prolyl hydroxylase  
22 inhibi\*" OR "hypoxia inducible factor  
23 stabili\*er\*" OR "roxadustat" OR "daprodustat" OR "vadadustat" OR "molidustat  
24 " OR "enarodustat" OR "desidustat" OR "fg-  
25 4592" OR "asp1517" OR "azd9941" OR "bay85-  
26 3934" OR "gsk1278863" OR "akb-6548" OR "jtz-951" OR "zyan-  
27 1" OR "ferroportin stabili\*er\*" OR "ferroportin  
28 agonist\*" OR "ly298057" OR "fursultiamine" OR "anticalin\*" OR "hepcidin  
29 binding protein\*" OR "prs-080" OR "antihepcidin  
30 antibod\*" OR "a12b9m" OR "ly2787106" OR "hepcidin  
31 spiegelmer\*" OR "hepcidin binding l-rna aptamer\*" OR "lexapetid pegol nox-  
32 h94" OR "short interfering rna" OR "shrna" OR "sirna" OR "short hairpin  
33 rna" OR "activin like kinase receptor inhibi\*" OR "alk2 inhibi\*" OR "alk3  
34 inhibi\*" OR "od66" OR "tp-  
35 0184" OR "incb00928" OR "momelotinib" OR "indazole" OR "ds79182026" O  
36 R "bone morphogenic protein type 1 receptor inhibi\*" OR "bmp type 1 receptor  
37 inhibi\*" OR "dorsomprhin" OR "ldn-193189" OR "ldn-  
38 212854" OR "hemojuvelin  
39 inhibi\*" OR "shjv" OR "imatinib" OR "spironolactone" OR "h5f923" OR "h5f  
40 9-am" OR "abt-207" OR "transferrin receptor rna" AND "an\*emia" ) AND  
41 5. PUBYEAR > 2009  
42  
43  
44  
45  
46  
47  
48  
49  
50  
51  
52  
53  
54  
55  
56  
57  
58  
59  
60

## Data extraction form

|                          |                                                                                                                                           |                          |
|--------------------------|-------------------------------------------------------------------------------------------------------------------------------------------|--------------------------|
| Date:                    | Investigator: AD PD CD LM                                                                                                                 | DOI                      |
| Title                    |                                                                                                                                           |                          |
| Author (s)               |                                                                                                                                           |                          |
| Citation                 |                                                                                                                                           |                          |
| Year of pub.             | Country                                                                                                                                   | Pub. Type                |
| Research question        |                                                                                                                                           |                          |
| Outcomes                 |                                                                                                                                           |                          |
| Population               |                                                                                                                                           |                          |
| Inclusion criteria       | [ ] adult pts (>18 y/o) [ ] anemia [ ] novel agents                                                                                       |                          |
| Exclusion criteria       | [ ] anemia 2'another hematological condition [ ] primary bone marrow disorder<br>[ ] renal disease [ ]hemolysis [ ]infection e.g. malaria |                          |
| Setting                  |                                                                                                                                           |                          |
| Sample size              |                                                                                                                                           |                          |
| Methodology              | [ ] prospective [ ] retrospective [ ]blinded [ ] open label [ ] randomized<br>[ ] non- randomized                                         |                          |
| Intervention             |                                                                                                                                           |                          |
| Comparator               | [ ] placebo [ ] SOC [ ] ESA [ ] PO iron [ ] IV iron [ ] no comparator                                                                     |                          |
| Duration of intervention |                                                                                                                                           |                          |
| Outcome and measures:    |                                                                                                                                           |                          |
| Timepoints               | Baseline                                                                                                                                  | 1 2 End Significance     |
| Δ Hb                     |                                                                                                                                           |                          |
| Δ Ferritin               |                                                                                                                                           |                          |
| Δ T sats                 |                                                                                                                                           |                          |
| Δ hepcidin               |                                                                                                                                           |                          |
| Major AE                 | Minor AE                                                                                                                                  | Admin comp               |
| HRQL                     | Y/N                                                                                                                                       | Disability free survival |
| Functional status        |                                                                                                                                           | DAAAH                    |
| Mortality                |                                                                                                                                           | Complications            |
| LOS                      |                                                                                                                                           | Health care costs        |

**PRISMA-P (Preferred Reporting Items for Systematic review and Meta-Analysis Protocols) 2015 checklist: recommended items to address in a systematic review protocol\***

| Section and topic                 | Item No | Checklist item                                                                                                                                                                                                                | Information reported (Y/N) | Page(s)     |
|-----------------------------------|---------|-------------------------------------------------------------------------------------------------------------------------------------------------------------------------------------------------------------------------------|----------------------------|-------------|
| <b>ADMINISTRATIVE INFORMATION</b> |         |                                                                                                                                                                                                                               |                            |             |
| Title:                            |         |                                                                                                                                                                                                                               |                            |             |
| Identification                    | 1a      | Identify the report as a protocol of a systematic review                                                                                                                                                                      | Y                          | 1           |
| Update                            | 1b      | If the protocol is for an update of a previous systematic review, identify as such                                                                                                                                            | NA                         | NA          |
| Registration                      | 2       | If registered, provide the name of the registry (such as PROSPERO) and registration number                                                                                                                                    | Y                          |             |
| Authors:                          |         |                                                                                                                                                                                                                               |                            |             |
| Contact                           | 3a      | Provide name, institutional affiliation, e-mail address of all protocol authors; provide physical mailing address of corresponding author                                                                                     | Y                          | 2           |
| Contributions                     | 3b      | Describe contributions of protocol authors and identify the guarantor of the review                                                                                                                                           | Y                          | 20          |
| Amendments                        | 4       | If the protocol represents an amendment of a previously completed or published protocol, identify as such and list changes; otherwise, state plan for documenting important protocol amendments                               | NA                         | NA          |
| Support:                          |         |                                                                                                                                                                                                                               |                            |             |
| Sources                           | 5a      | Indicate sources of financial or other support for the review                                                                                                                                                                 | Y                          | 20          |
| Sponsor                           | 5b      | Provide name for the review funder and/or sponsor                                                                                                                                                                             | NA                         | 20          |
| Role of sponsor or funder         | 5c      | Describe roles of funder(s), sponsor(s), and/or institution(s), if any, in developing the protocol                                                                                                                            | Y                          | 20          |
| <b>INTRODUCTION</b>               |         |                                                                                                                                                                                                                               |                            |             |
| Rationale                         | 6       | Describe the rationale for the review in the context of what is already known                                                                                                                                                 | Y                          | 6           |
| Objectives                        | 7       | Provide an explicit statement of the question(s) the review will address with reference to participants, interventions, comparators, and outcomes (PICO)                                                                      | Y                          | 8           |
| <b>METHODS</b>                    |         |                                                                                                                                                                                                                               |                            |             |
| Eligibility criteria              | 8       | Specify the study characteristics (such as PICO, study design, setting, time frame) and report characteristics (such as years considered, language, publication status) to be used as criteria for eligibility for the review | Y                          | 9-13        |
| Information sources               | 9       | Describe all intended information sources (such as electronic databases, contact with study authors, trial registers or other grey literature sources) with planned dates of coverage                                         | Y                          | 13          |
| Search strategy                   | 10      | Present draft of search strategy to be used for at least one electronic database, including planned limits, such that it could be repeated                                                                                    | Y                          | Sup. file 1 |

1  
2  
3  
4  
5  
6  
7  
8  
9  
10  
11  
12  
13  
14  
15  
16  
17  
18  
19  
20  
21  
22  
23  
24  
25  
26  
27  
28  
29  
30  
31  
32  
33  
34  
35  
36  
37  
38  
39  
40  
41  
42  
43  
44  
45  
46

|                                    |     |                                                                                                                                                                                                                                                           |    |       |
|------------------------------------|-----|-----------------------------------------------------------------------------------------------------------------------------------------------------------------------------------------------------------------------------------------------------------|----|-------|
| Study records:                     |     |                                                                                                                                                                                                                                                           |    |       |
| Data management                    | 11a | Describe the mechanism(s) that will be used to manage records and data throughout the review                                                                                                                                                              | Y  | 14    |
| Selection process                  | 11b | State the process that will be used for selecting studies (such as two independent reviewers) through each phase of the review (that is, screening, eligibility and inclusion in meta-analysis)                                                           | Y  | 15    |
| Data collection process            | 11c | Describe planned method of extracting data from reports (such as piloting forms, done independently, in duplicate), any processes for obtaining and confirming data from investigators                                                                    | Y  | 15    |
| Data items                         | 12  | List and define all variables for which data will be sought (such as PICO items, funding sources), any pre-planned data assumptions and simplifications                                                                                                   | Y  | 15-16 |
| Outcomes and prioritization        | 13  | List and define all outcomes for which data will be sought, including prioritization of main and additional outcomes, with rationale                                                                                                                      | Y  | 16-17 |
| Risk of bias in individual studies | 14  | Describe anticipated methods for assessing risk of bias of individual studies, including whether this will be done at the outcome or study level, or both; state how this information will be used in data synthesis                                      | Y  | 17    |
| Data synthesis                     | 15a | Describe criteria under which study data will be quantitatively synthesised                                                                                                                                                                               | Y  | 18    |
|                                    | 15b | If data are appropriate for quantitative synthesis, describe planned summary measures, methods of handling data and methods of combining data from studies, including any planned exploration of consistency (such as I <sup>2</sup> , Kendall's $\tau$ ) | NA |       |
|                                    | 15c | Describe any proposed additional analyses (such as sensitivity or subgroup analyses, meta-regression)                                                                                                                                                     | NA |       |
|                                    | 15d | If quantitative synthesis is not appropriate, describe the type of summary planned                                                                                                                                                                        | Y  | 18    |
| Meta-bias(es)                      | 16  | Specify any planned assessment of meta-bias(es) (such as publication bias across studies, selective reporting within studies)                                                                                                                             | NA | 18    |
| Confidence in cumulative evidence  | 17  | Describe how the strength of the body of evidence will be assessed (such as GRADE)                                                                                                                                                                        | NA | 18    |

**\* It is strongly recommended that this checklist be read in conjunction with the PRISMA-P Explanation and Elaboration (cite when available) for important clarification on the items. Amendments to a review protocol should be tracked and dated. The copyright for PRISMA-P (including checklist) is held by the PRISMA-P Group and is distributed under a Creative Commons Attribution Licence 4.0.**

*From: Shamseer L, Moher D, Clarke M, Ghersi D, Liberati A, Petticrew M, Shekelle P, Stewart L, PRISMA-P Group. Preferred reporting items for systematic review and meta-analysis protocols (PRISMA-P) 2015: elaboration and explanation. BMJ. 2015 Jan 2;349(jan02 1):g7647.*
