# Supplementary material for: Non-erythropoiesis-stimulating agent, non-iron therapies for the management of anaemia: protocol for a scoping review
Source: PubMed Central journal article supplement — BMJ Open. 2022 Apr 10;12(4):e059059. doi: 10.1136/bmjopen-2021-059059 (PMC9003621; doi:10.1136/bmjopen-2021-059059), 2022-04-10
Supplement: bmjopen-2021-059059supp001.pdf [file bmjopen-2021-059059supp001.pdf]

**Search Strategy****Medline:**

- 1 iron defic\*.ti.
- 2 an\*emia not (leuk\*emia or h\*emolytic or sickle or malaria or myelodysplas\* or sideroblast\* or thalassemia\*).ti.
- 3 h\*emoglobin.tw.
- 4 treatment\* or therap\* or drug\* or pharm\*.tw.
- 5 1 or 2
- 6 5 and 3 and 4
- 7 STAT3 inhibi\* or AG490 or ppYLKTK.tw.
- 8 AMPK activ\* or metformin or DS79182026.tw.
- 9 IL-6 inhibi\* or interleukin-6 inhibi\* or toclizumab or siltuximab.tw.
- 10 IL-1 inhibit\* or interleukin 1 inhibit\* or canakinumab.tw. 1372
- 11 erythroferron\*.tw.
- 12 Prolyl-Hydroxylase Inhibitors/ or hypoxia inducible factor prolyl hydroxylase inhibitors.mp. or Hypoxia-Inducible Factor-Proline Dioxygenases/ hypoxia inducible factor stabili\*er\*.tw.
- 14 roxadustat.tw.
- 15 daprodustat.tw.
- 16 vadadustat.tw.
- 17 molidustat.tw.
- 18 enarodustat.tw.
- 19 desidustat.tw.
- 20 FG-4592.tw.
- 21 ASP1517.tw.
- 22 AZD9941.tw.
- 23 BAY85-3934.tw.
- 24 GSK1278863.tw.
- 25 AKB-6548.tw.
- 26 JTZ-951.tw.
- 27 ZYAN-1.tw.
- 28 ferroportin stabili\*er\* or ferroportin agonist\* or LY298057 or fursultiamine.tw.
- 29 anticalin\* or hepcidin binding protein\* or PRS-080.tw.
- 30 antihepcidin antibod\* or A12B9m or Ly2787106.tw.
- 31 hepcidin spiegelmer\* or hepcidin binding L-RNA aptamer\* or lexapetid pegol NOX-H94.tw. 2
- 32 (short interfering RNA or shRNA or siRNA or short hairpin RNA or H6 or H10 or ALN-HPN) and hepcidin.mp.
- 33 activin like kinase receptor inhibit\* or ALK2 inhibit\* or ALK3 inhibit\* or OD66 or TP-0184 or INCB00928 or momelotinib or indazole or DS79182026.tw.
- 34 bone morphogenic protein type 1 receptor inhibit\* or BMP type 1 receptor inhibit\* or dorsomorphin or LDN-193189 or LDN-212854.tw.
- 35 BMP6 inhibit\* or bone morphogenic protein 6 inhibit\* or imatinib or spironolactone.tw.
- 36 hemojuvelin inhibit\* or hemojuvelin antibod\* or sHJV or h5F923 or h5F9-AM or ABT-207.tw.
- 37 transferrin receptor RNAi.tw.
- 38 7 or 8 or 9 or 10 or 11 or 12 or 13 or 14 or 15 or 16 or 17 or 18 or 19 or 20 or 21 or 22 or 23 or 24 or 25 or 26 or 27 or 28 or 29 or 30 or 31 or 32 or 33 or 34 or 35 or 36 or 37
- 39 5 and 38

- 40 6 or 39  
 41 limit 40 to (humans and yr="2010 -Current")

**Embase Classic + Embase:**

- 1 iron defic\*.ti.  
 2 an\*emia not (leuk\*emia or h\*emolytic or sickle or malaria or myelodysplas\* or sideroblast\* or thalassemia\*).ti.  
 3 h\*emoglobin.tw.  
 4 treatment\* or therap\* or drug\* or pharm\*.tw.  
 5 1 or 2  
 6 5 and 3 and 4  
 7 STAT3 inhibi\* or AG490 or ppYLKTK.tw.  
 8 AMPK activ\* or metformin or DS79182026.tw.  
 9 IL-6 inhibi\* or interleukin-6 inhibi\* or tocilizumab or siltuximab.tw.  
 10 IL-1 inhibit\* or interleukin 1 inhibit\* or canakinumab.tw. 1372  
 11 erythroferron\*.tw.  
 12 Prolyl-Hydroxylase Inhibitors/ or hypoxia inducible factor prolyl hydroxylase inhibitors.mp. or Hypoxia-Inducible Factor-Proline Dioxygenases/  
 13 hypoxia inducible factor stabili\*er\*.tw.  
 14 roxadustat.tw.  
 15 daprodustat.tw.  
 16 vadadustat.tw.  
 17 molidustat.tw.  
 18 enarodustat.tw.  
 19 desidustat.tw.  
 20 FG-4592.tw.  
 21 ASP1517.tw.  
 22 AZD9941.tw.  
 23 BAY85-3934.tw.  
 24 GSK1278863.tw.  
 25 AKB-6548.tw.  
 26 JTZ-951.tw.  
 27 ZYAN-1.tw.  
 28 ferroportin stabili\*er\* or ferroportin agonist\* or LY298057 or fursultiamine.tw.  
 29 anticalin\* or hepcidin binding protein\* or PRS-080.tw.  
 30 antihepcidin antibod\* or A12B9m or Ly2787106.tw.  
 31 hepcidin spiegelmer\* or hepcidin binding L-RNA aptamer\* or lexapetid pegol NOX-H94.tw. 2  
 32 (short interfering RNA or shRNA or siRNA or short hairpin RNA or H6 or H10 or ALN-HPN) and hepcidin.mp.  
 33 activin like kinase receptor inhibit\* or ALK2 inhibit\* or ALK3 inhibit\* or OD66 or TP-0184 or INCB00928 or momelotinib or indazole or DS79182026.tw.  
 34 bone morphogenic protein type 1 receptor inhibit\* or BMP type 1 receptor inhibit\* or dorsomorphin or LDN-193189 or LDN-212854.tw.  
 35 BMP6 inhibit\* or bone morphogenic protein 6 inhibit\* or imatinib or spironolactone.tw.  
 36 hemojuvelin inhibit\* or hemojuvelin antibod\* or sHJV or h5F923 or h5F9-AM or ABT-207.tw.  
 37 transferrin receptor RNAi.tw.

- 38 7 or 8 or 9 or 10 or 11 or 12 or 13 or 14 or 15 or 16 or 17 or 18 or 19 or 20 or 21 or 22  
or 23 or 24 or 25 or 26 or 27 or 28 or 29 or 30 or 31 or 32 or 33 or 34 or 35 or 36 or 37
- 39 5 and 38
- 40 6 or 39
- 41 limit 40 to (humans and yr="2010 -Current")

## Scopus

1. TITLE-ABS-KEY  
(treatment OR therap\* OR pharm\* OR safe\* OR efficacy OR drug\*) AND
2. TITLE (an\*emia) OR TITLE ( "iron defic\*" ) AND
3. TITLE-ABS-KEY ( h\*emoglobin ) OR
4. TITLE-ABS-KEY ( "stat3 inhibi\*" OR "ag490" OR "ppylktk" "ampk  
activ\*" OR "metformin" OR "ds78182026" OR "il-6 inhibit\*" OR "interleukin-6  
inhibi\*" OR "toclizumab" OR "siltuximab" OR "il-1 inhibit\*" OR "interleukin 1  
inhibi\*" OR "canakinumab" OR "erythroferon\*" OR "prolyl hydroxylase  
inhibi\*" OR "hypoxia inducible factor prolyl hydroxylase inhibi\*" OR "hypoxia  
inducible factor proline dioxygenase\*" OR "hif prolyl hydroxylase  
inhibi\*" OR "hypoxia inducible factor  
stabili\*er\*" OR "roxadustat" OR "daprodustat" OR "vadadustat" OR "molidustat  
" OR "enarodustat" OR "desidustat" OR "fg-  
4592" OR "asp1517" OR "azd9941" OR "bay85-  
3934" OR "gsk1278863" OR "akb-6548" OR "jtz-951" OR "zyan-  
1" OR "ferroportin stabili\*er\*" OR "ferroportin  
agonist\*" OR "ly298057" OR "fursultiamine" OR "anticalin\*" OR "hepcidin  
binding protein\*" OR "prs-080" OR "antihepcidin  
antibod\*" OR "a12b9m" OR "ly2787106" OR "hepcidin  
spiegelmer\*" OR "hepcidin binding l-rna aptamer\*" OR "lexapetid pegol nox-  
h94" OR "short interfering rna" OR "shrna" OR "sirna" OR "short hairpin  
rna" OR "activin like kinase receptor inhibi\*" OR "alk2 inhibi\*" OR "alk3  
inhibi\*" OR "od66" OR "tp-  
0184" OR "incb00928" OR "momelotinib" OR "indazole" OR "ds79182026" O  
R "bone morphogenic protein type 1 receptor inhibi\*" OR "bmp type 1 receptor  
inhibi\*" OR "dorsomprhin" OR "ldn-193189" OR "ldn-  
212854" OR "hemojuvelin  
inhibi\*" OR "shjv" OR "imatinib" OR "spironolactone" OR "h5f923" OR "h5f  
9-am" OR "abt-207" OR "transferrin receptor rnai" AND "an\*emia" ) AND
5. PUBYEAR > 2009
