# Supplementary material for: Non-erythropoiesis-stimulating agent, non-iron therapies for the management of anaemia: protocol for a scoping review
Source: PubMed Central journal article supplement — BMJ Open. 2022 Apr 10;12(4):e059059. doi: 10.1136/bmjopen-2021-059059 (PMC9003621; doi:10.1136/bmjopen-2021-059059), 2022-04-10
Supplement: bmjopen-2021-059059supp002.pdf [file bmjopen-2021-059059supp002.pdf]

## Data extraction form

|                          |                                                                                                                                           |                          |            |     |              |
|--------------------------|-------------------------------------------------------------------------------------------------------------------------------------------|--------------------------|------------|-----|--------------|
| Date:                    | Investigator: AD PD CD LM                                                                                                                 |                          |            | DOI |              |
| Title                    |                                                                                                                                           |                          |            |     |              |
| Author (s)               |                                                                                                                                           |                          |            |     |              |
| Citation                 |                                                                                                                                           |                          |            |     |              |
| Year of pub.             | Country                                                                                                                                   | Pub. Type                |            |     |              |
| Research question        |                                                                                                                                           |                          |            |     |              |
| Outcomes                 |                                                                                                                                           |                          |            |     |              |
| Population               |                                                                                                                                           |                          |            |     |              |
| Inclusion criteria       | [ ] adult pts (>18 y/o) [ ] anemia [ ] novel agents                                                                                       |                          |            |     |              |
| Exclusion criteria       | [ ] anemia 2'another hematological condition [ ] primary bone marrow disorder<br>[ ] renal disease [ ]hemolysis [ ]infection e.g. malaria |                          |            |     |              |
| Setting                  |                                                                                                                                           |                          |            |     |              |
| Sample size              |                                                                                                                                           |                          |            |     |              |
| Methodology              | [ ] prospective [ ] retrospective [ ]blinded [ ] open label [ ] randomized<br>[ ] non- randomized                                         |                          |            |     |              |
| Intervention             |                                                                                                                                           |                          |            |     |              |
| Comparator               | [ ] placebo [ ] SOC [ ] ESA [ ] PO iron [ ] IV iron [ ] no comparator                                                                     |                          |            |     |              |
| Duration of intervention |                                                                                                                                           |                          |            |     |              |
| Outcome and measures:    |                                                                                                                                           |                          |            |     |              |
| Timepoints               | Baseline                                                                                                                                  | 1                        | 2          | End | Significance |
| Δ Hb                     |                                                                                                                                           |                          |            |     |              |
| Δ Ferritin               |                                                                                                                                           |                          |            |     |              |
| Δ T sats                 |                                                                                                                                           |                          |            |     |              |
| Δ hepcidin               |                                                                                                                                           |                          |            |     |              |
| Major AE                 | Minor AE                                                                                                                                  |                          | Admin comp |     |              |
| HRQL                     | Y/N                                                                                                                                       | Disability free survival |            |     |              |
| Functional status        | DAAAH                                                                                                                                     |                          |            |     |              |
| Mortality                | Complications                                                                                                                             |                          |            |     |              |
| LOS                      | Health care costs                                                                                                                         |                          |            |     |              |
